# Supplementary material for: An aza-Diels–Alder approach to nitrogen-containing tetrabenzoacene derivatives
Source: Royal Society of Chemistry journal article supplement (doi:10.1039/d3ra07136g), 2024-01-01
Supplement: d3ra07136g1.pdf [file d3ra07136g1.pdf]

## Electronic Supplementary Information for

### An aza-Diels–Alder approach to nitrogen-containing tetrabenzoacene derivatives

Ethan R. Peng,<sup>a,b,‡</sup> Anthony M. Burke,<sup>c,‡</sup> David J. Dibble,<sup>c,‡</sup> Chandra B. KC,<sup>c,‡</sup> Reina Kurakake,<sup>a,‡</sup> Panyiming Liu,<sup>a</sup> Robert Lopez,<sup>a</sup> Philip R. Dennison,<sup>b</sup> Alon A. Gorodetsky<sup>a,c,\*</sup>

<sup>a</sup>*Department of Materials Science and Engineering, University of California, Irvine, Irvine, CA 92697, USA*

<sup>b</sup>*Department of Chemistry, University of California, Irvine, Irvine, CA 92697, USA*

<sup>c</sup>*Department of Chemical and Biomolecular Engineering, University of California, Irvine, Irvine, CA 92697, USA*

<sup>‡</sup>*These authors contributed equally: Ethan R. Peng, Anthony M. Burke, David J. Dibble, Chandra B. KC, Reina Kurakake.*

*\*Correspondence to: [alon.gorodetsky@uci.edu](mailto:alon.gorodetsky@uci.edu)*

#### Table of Contents:

|     |                                                              |      |
|-----|--------------------------------------------------------------|------|
| I.  | <sup>1</sup> H NMR and <sup>13</sup> C NMR Spectroscopy Data | S-2  |
| II. | UV-Vis Spectroscopy Data                                     | S-40 |

# I. $^1\text{H}$ NMR and $^{13}\text{C}$ NMR Spectroscopy Data

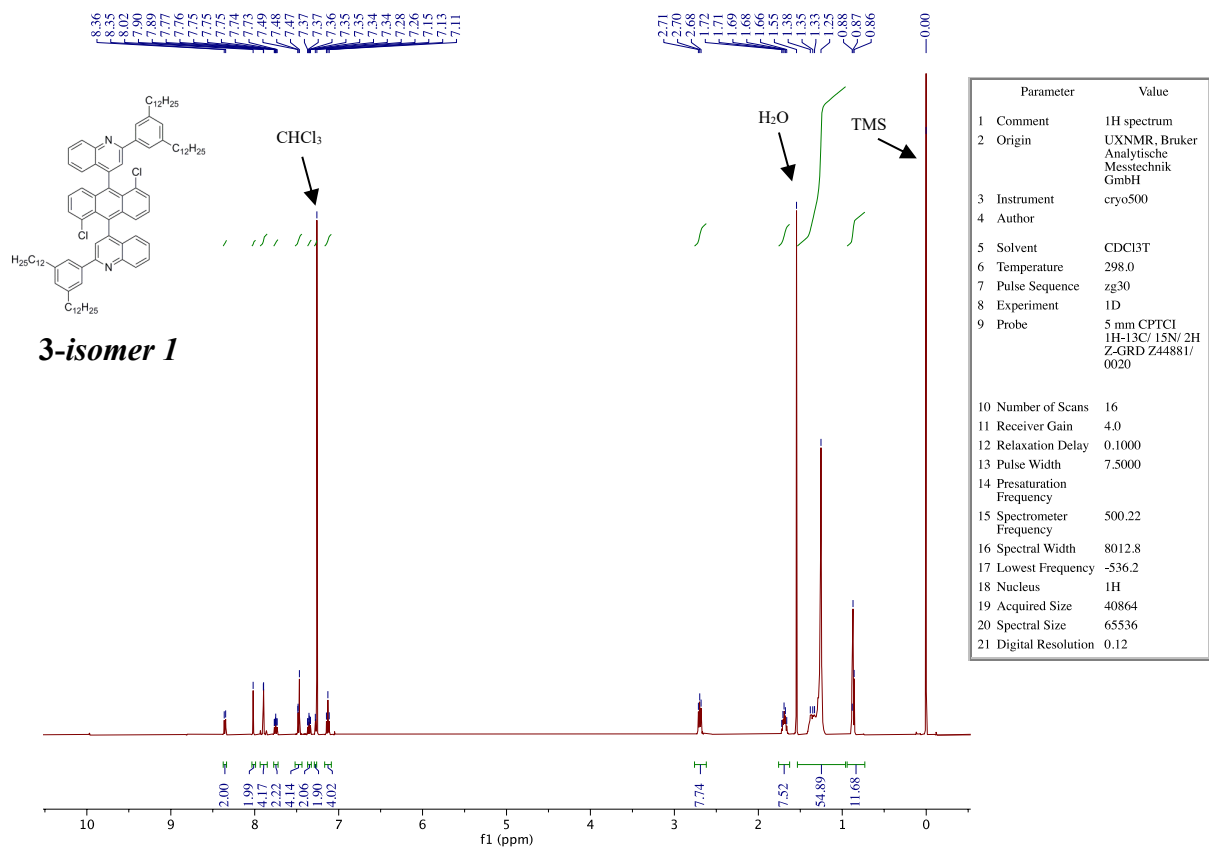

Figure S1. The  $^1\text{H}$  NMR spectrum obtained for **3-isomer 1**.

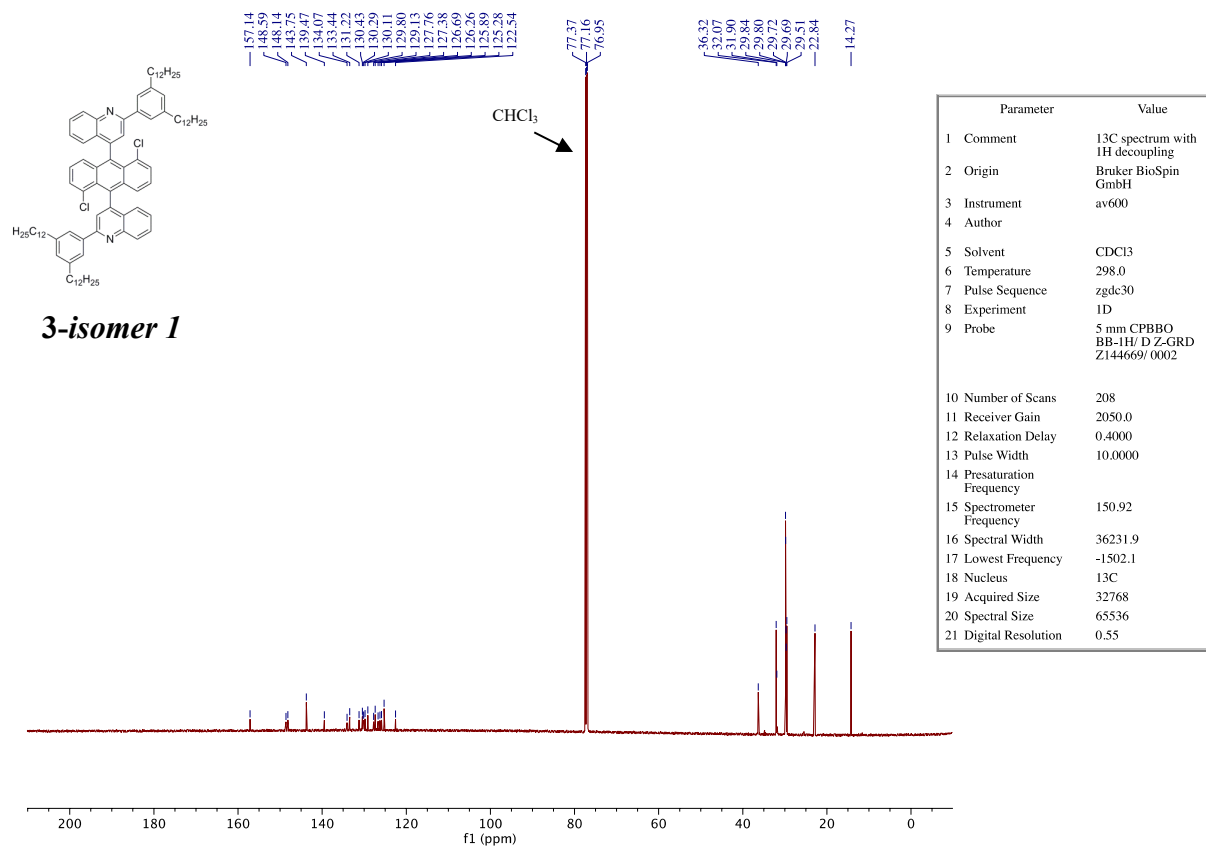

**Figure S2.** The <sup>13</sup>C NMR spectrum obtained for **3-isomer 1**.

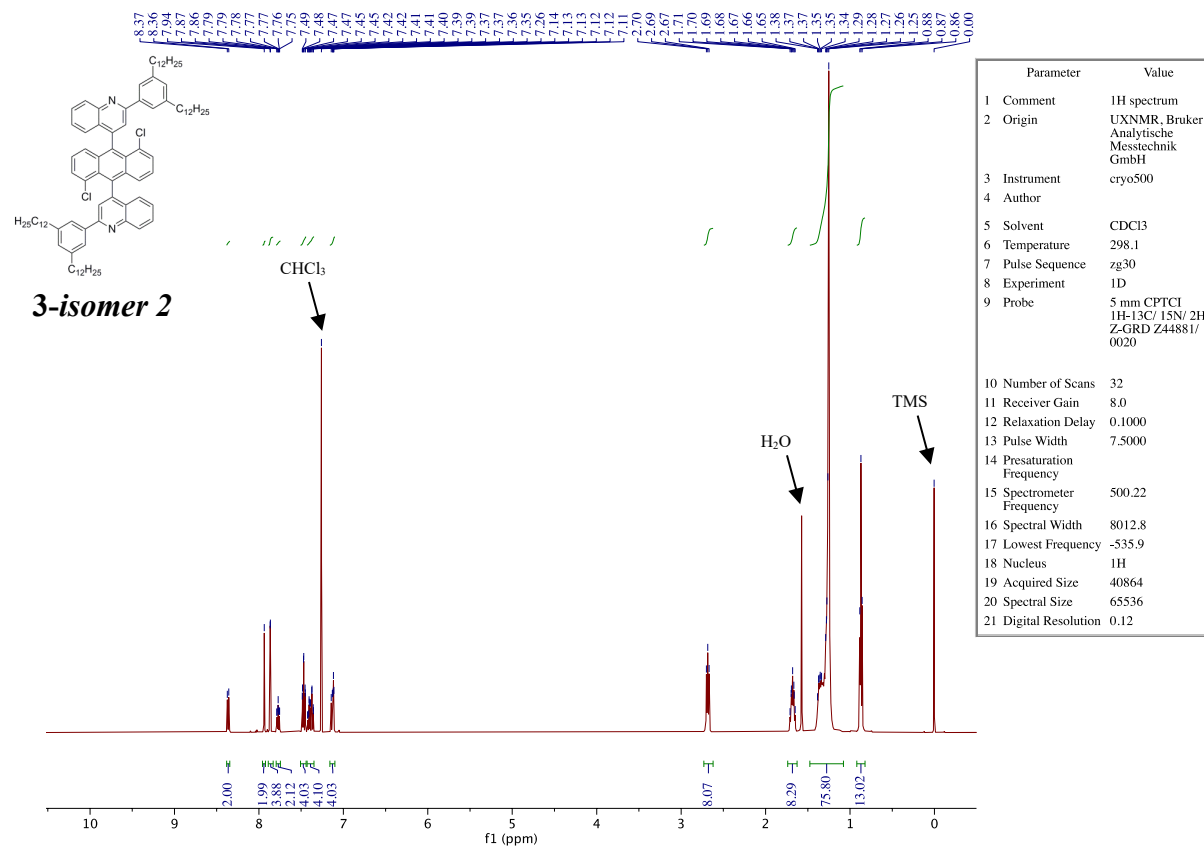

Figure S3. The <sup>1</sup>H NMR spectrum obtained for **3-isomer 2**.

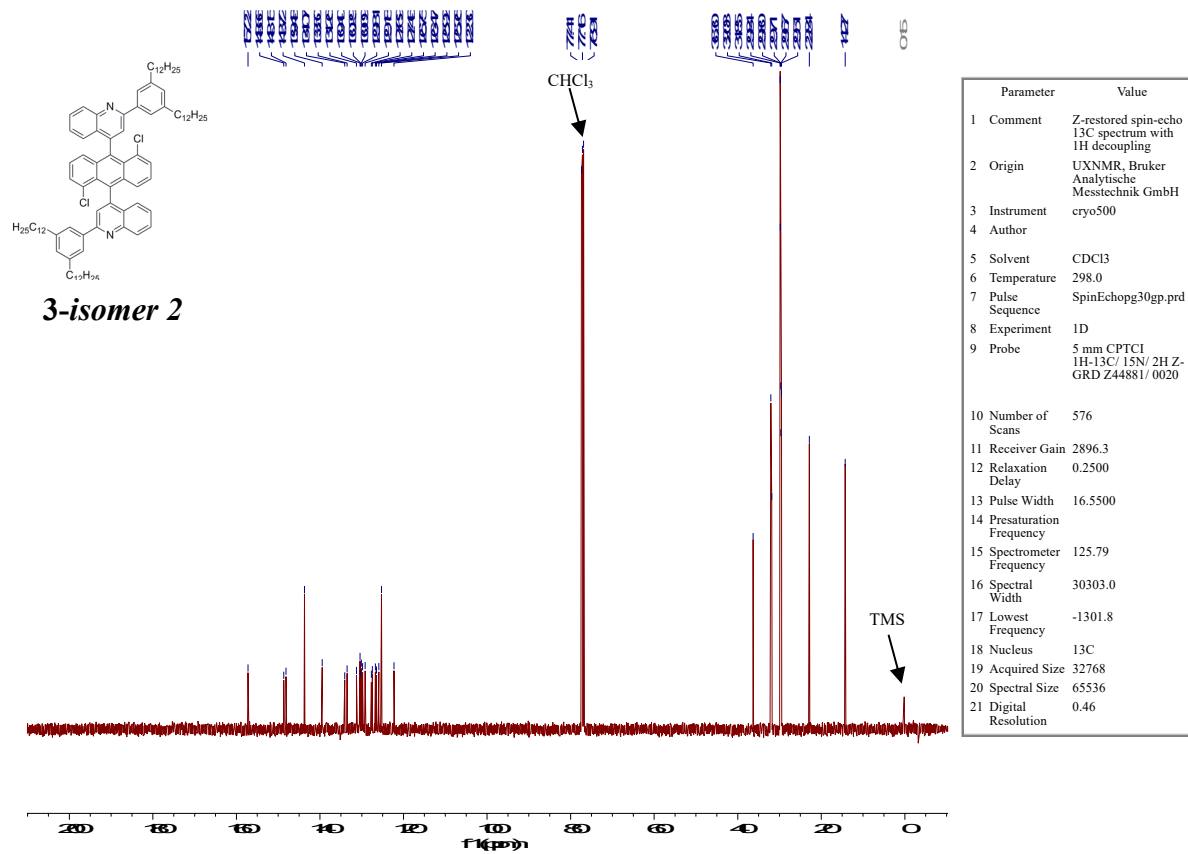

Figure S4. The  $^{13}\text{C}$  NMR spectrum obtained for **3-isomer 2**.

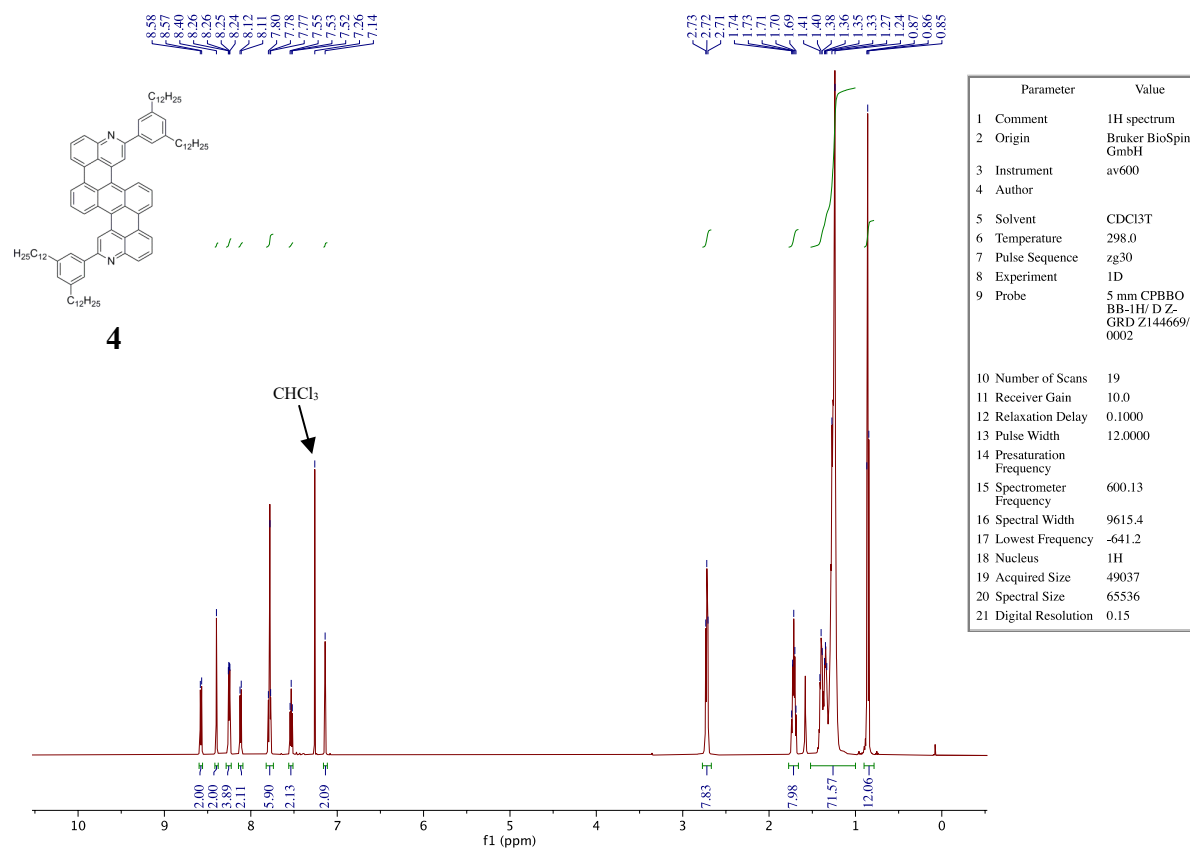

**Figure S5.** The <sup>1</sup>H NMR spectrum obtained for 4.

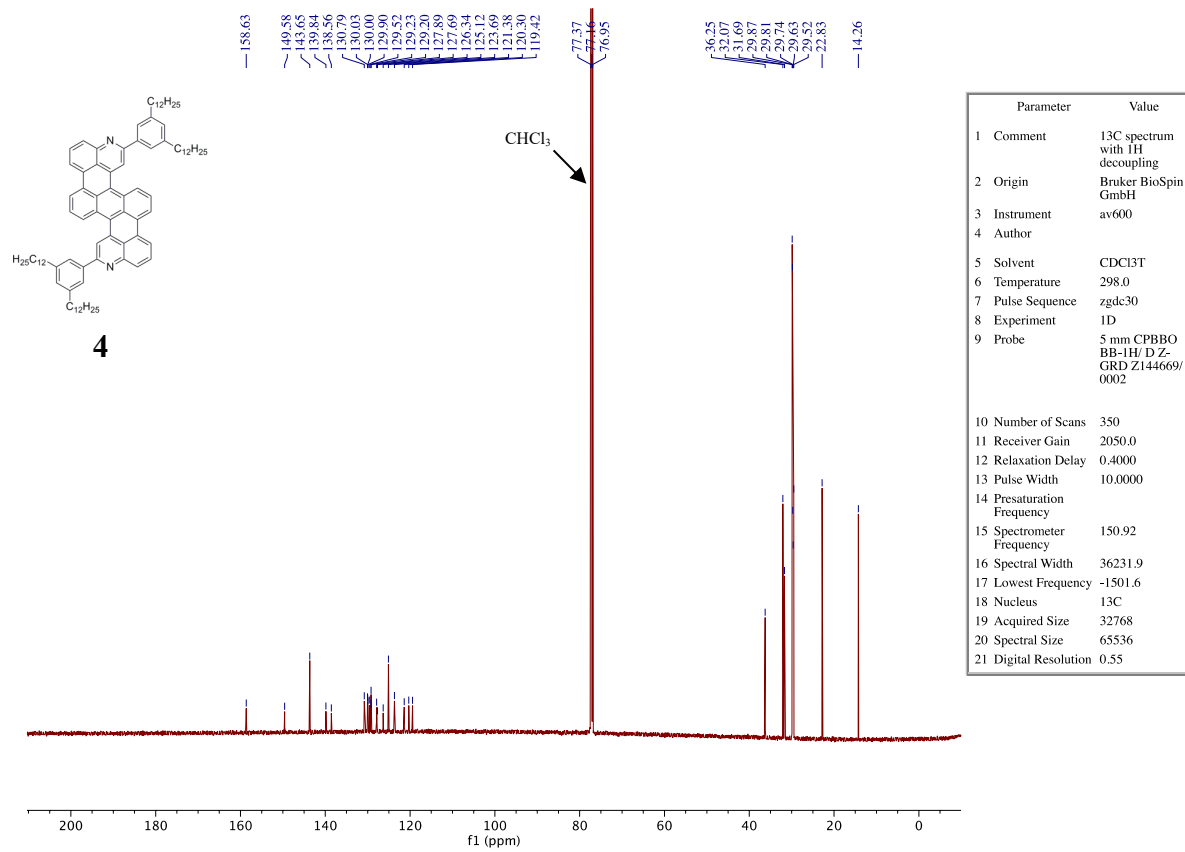

Figure S6. The  $^{13}\text{C}$  NMR spectrum obtained for 4.

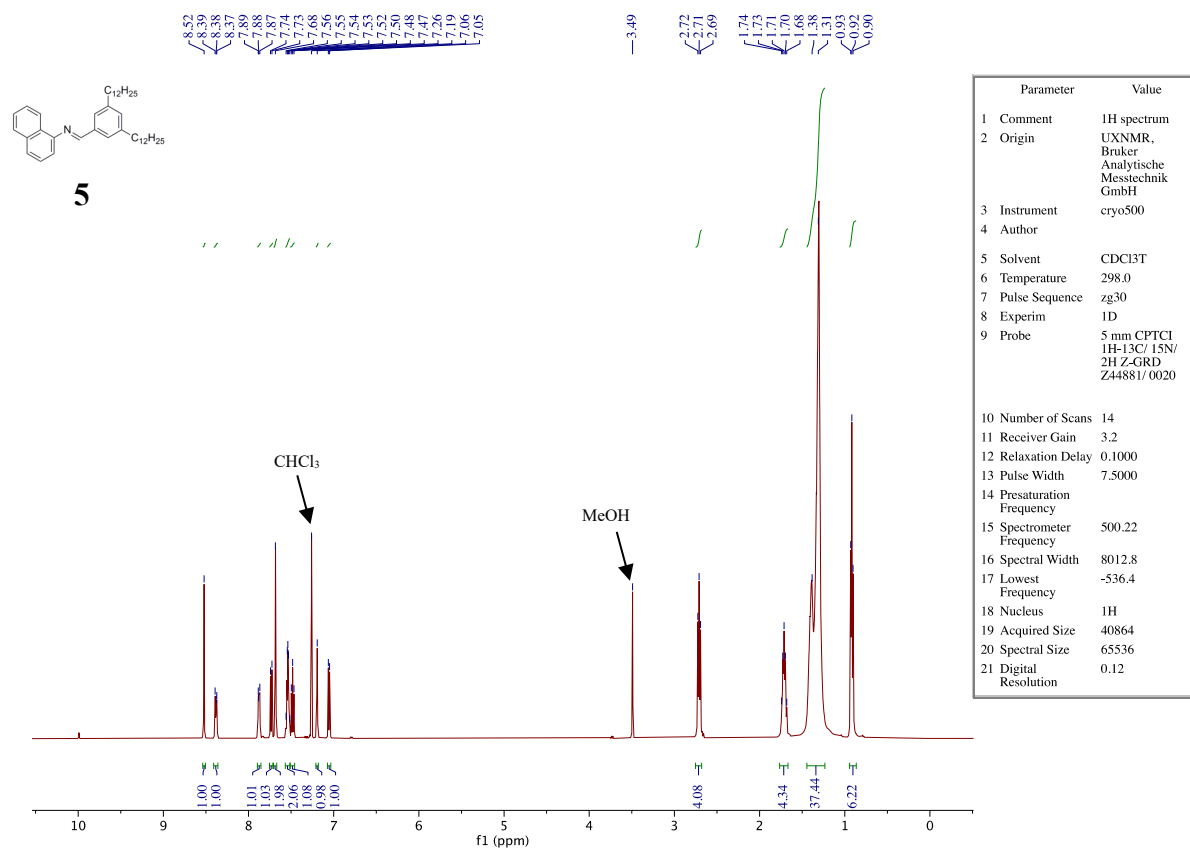

**Figure S7.** The <sup>1</sup>H NMR spectrum obtained for **5**.



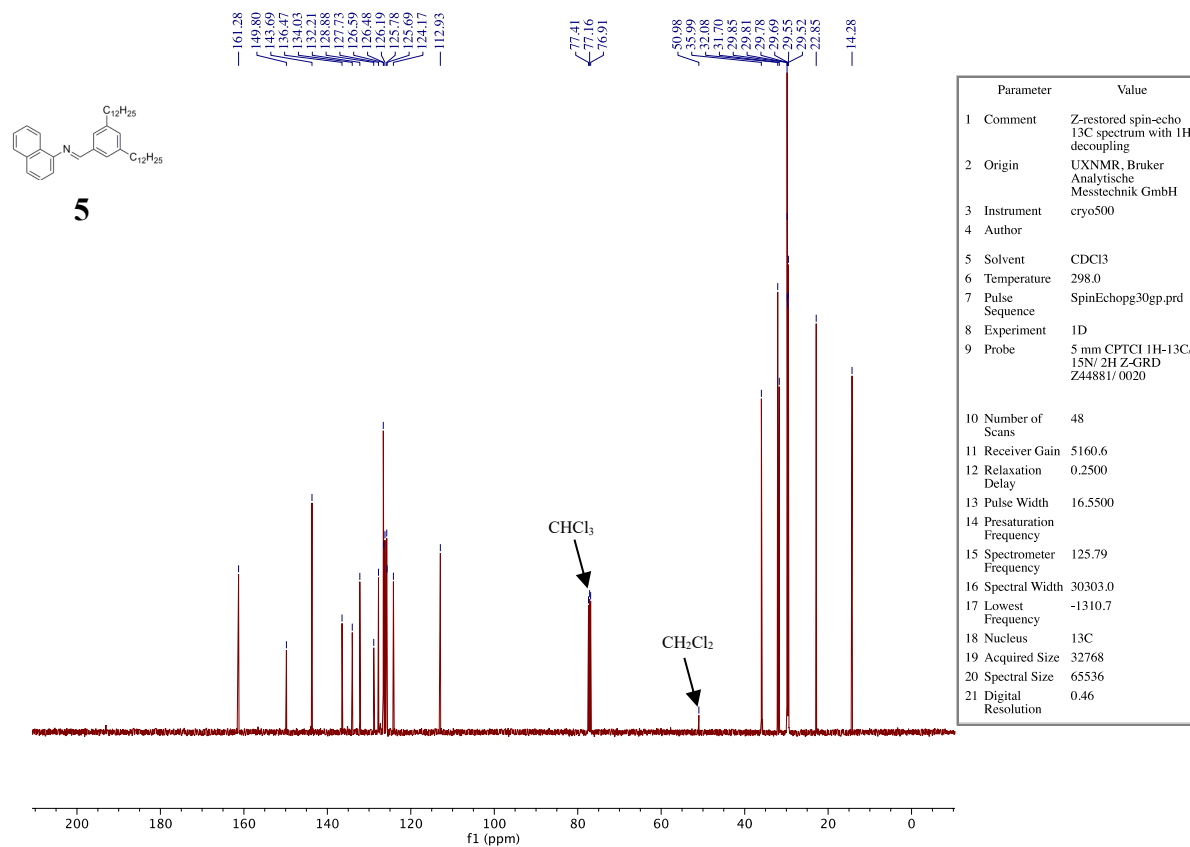

**Figure S8.** The  $^{13}\text{C}$  NMR spectrum obtained for **5**.

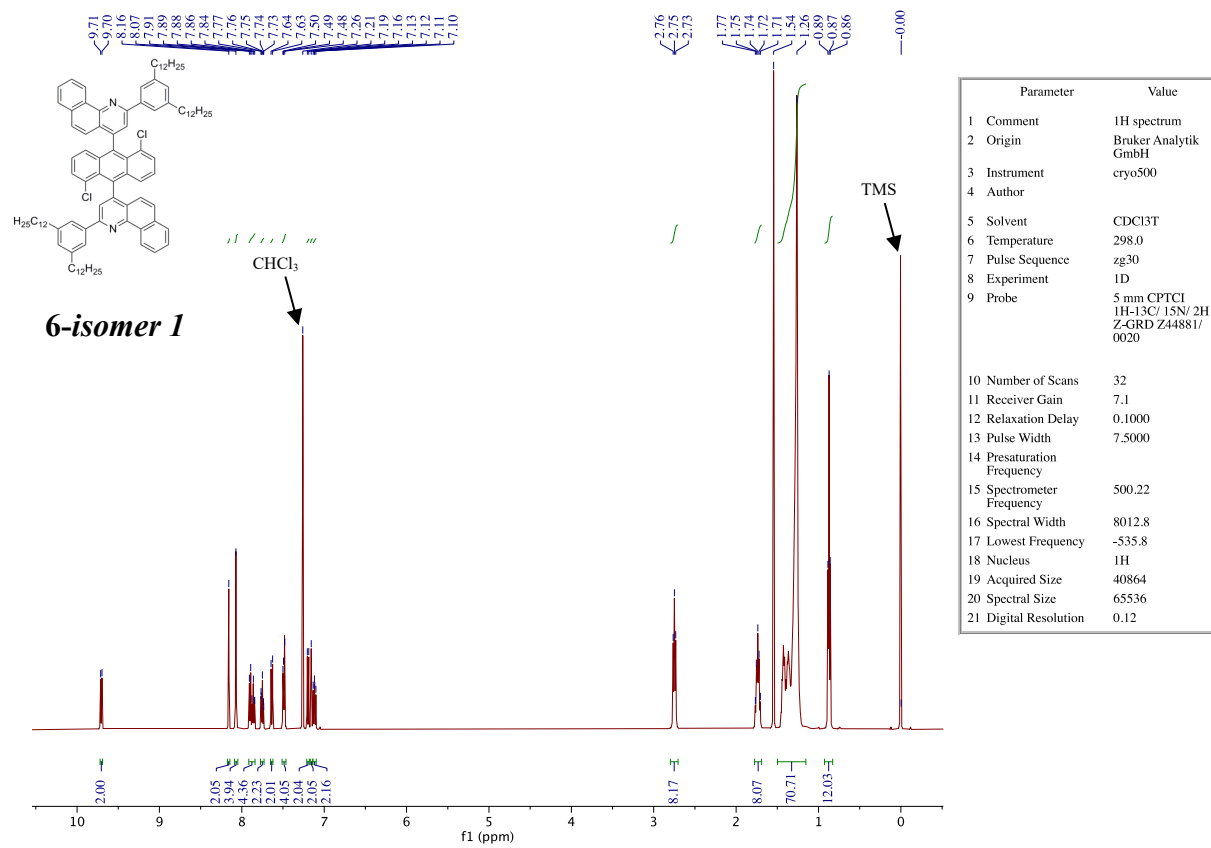

Figure S9. The <sup>1</sup>H NMR spectrum obtained for **6-isomer 1**.

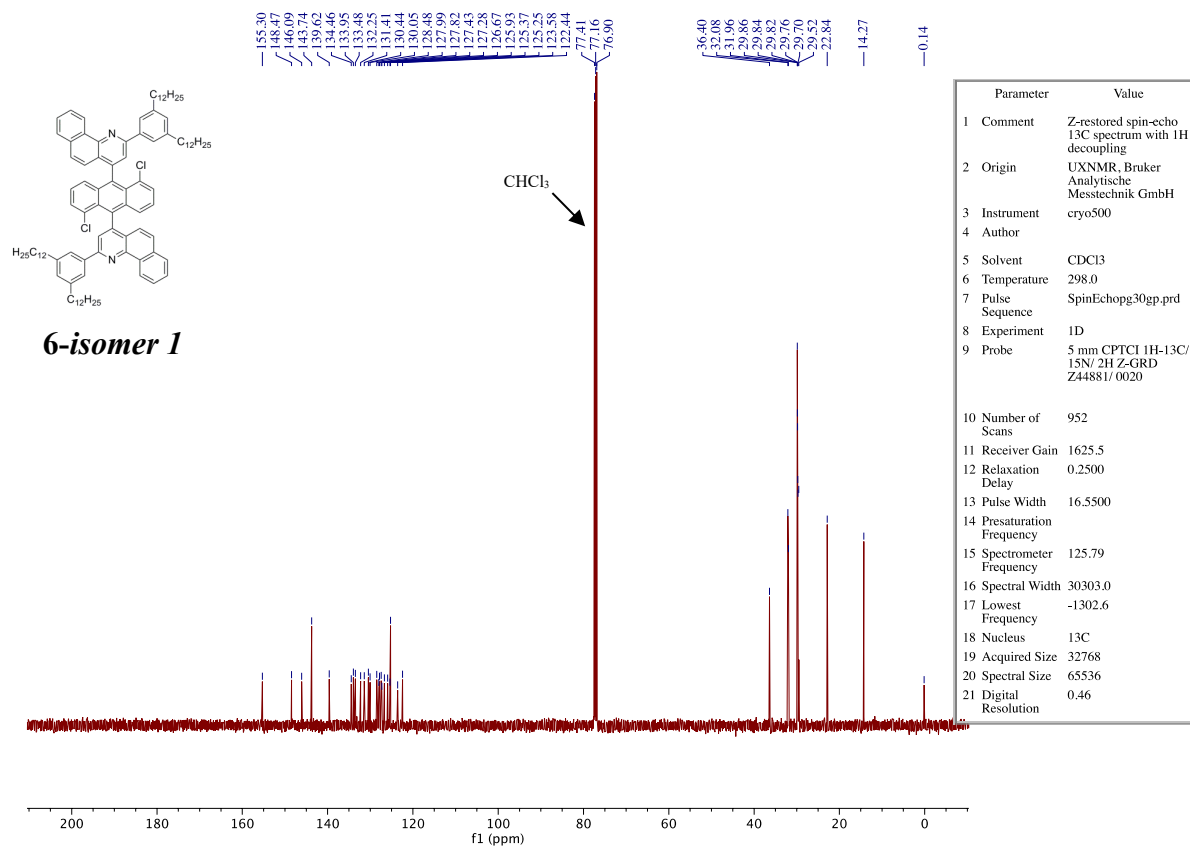

Figure S10. The <sup>13</sup>C NMR spectrum obtained for **6-isomer 1**.

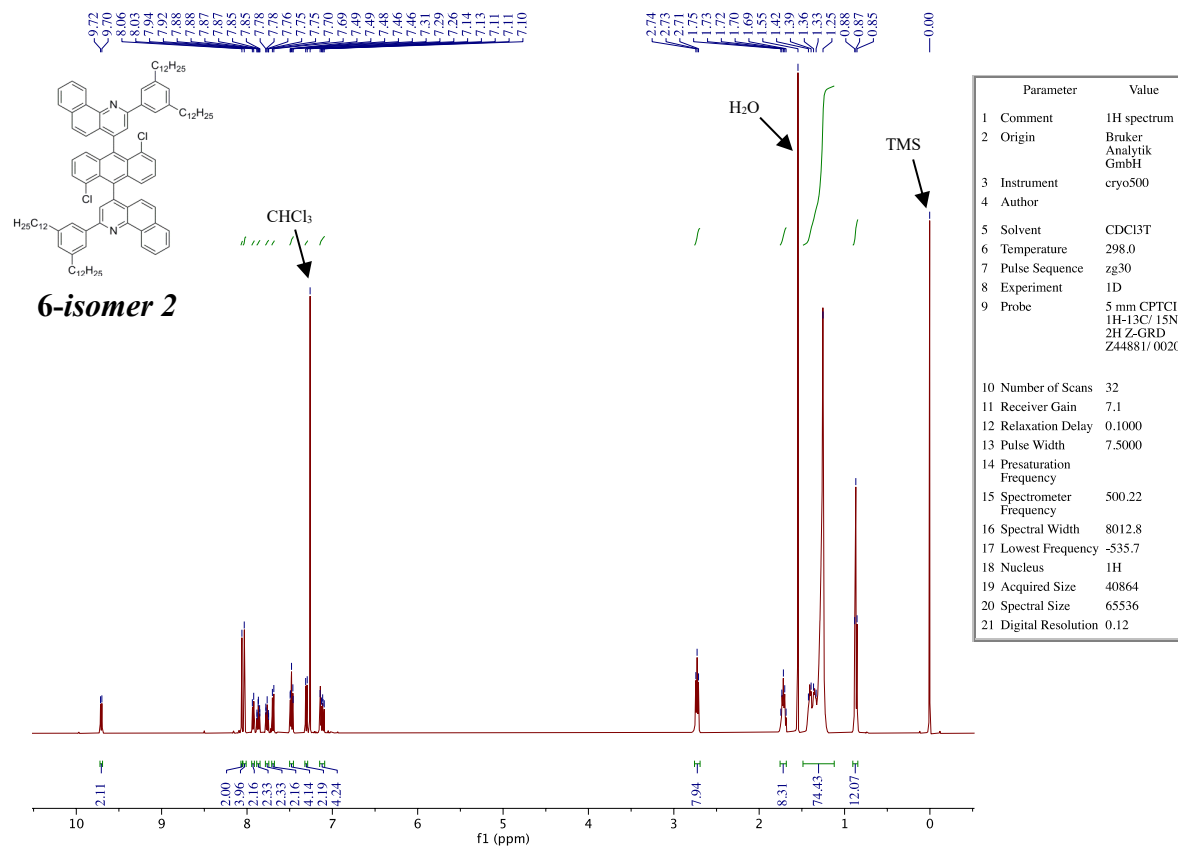

Figure S11. The  $^1\text{H}$  NMR spectrum obtained for **6-isomer 2**.

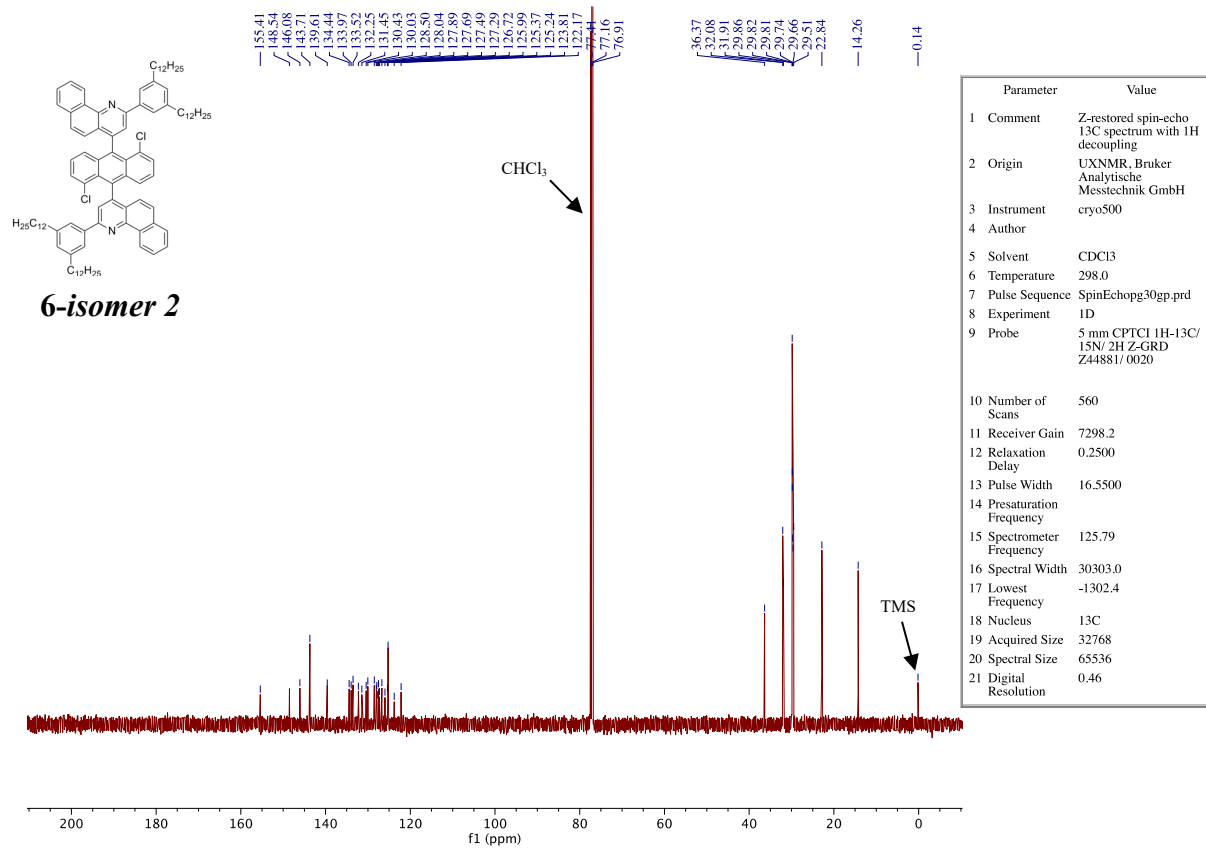

Figure S12. The <sup>13</sup>C NMR spectrum obtained for **6-isomer 2**.

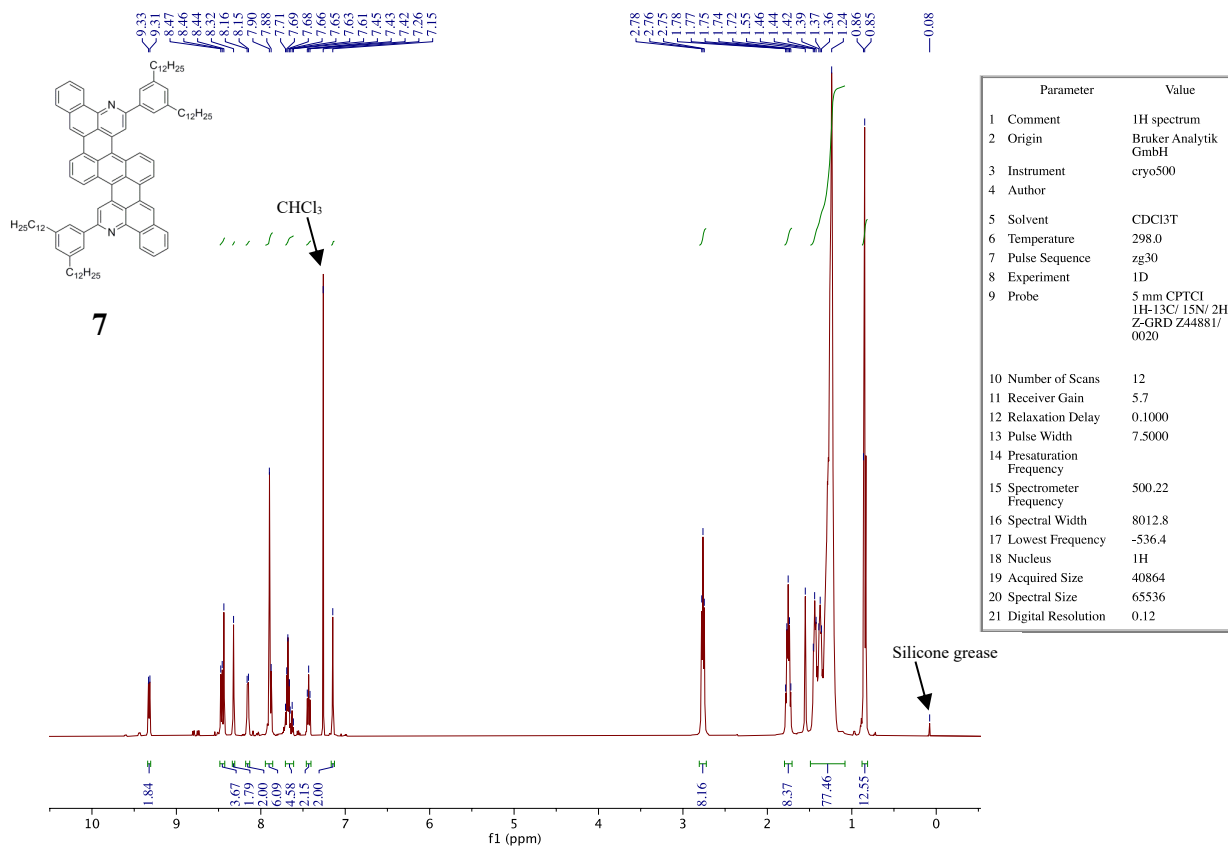

**Figure S13.** The  $^1\text{H}$  NMR spectrum obtained for **7**.

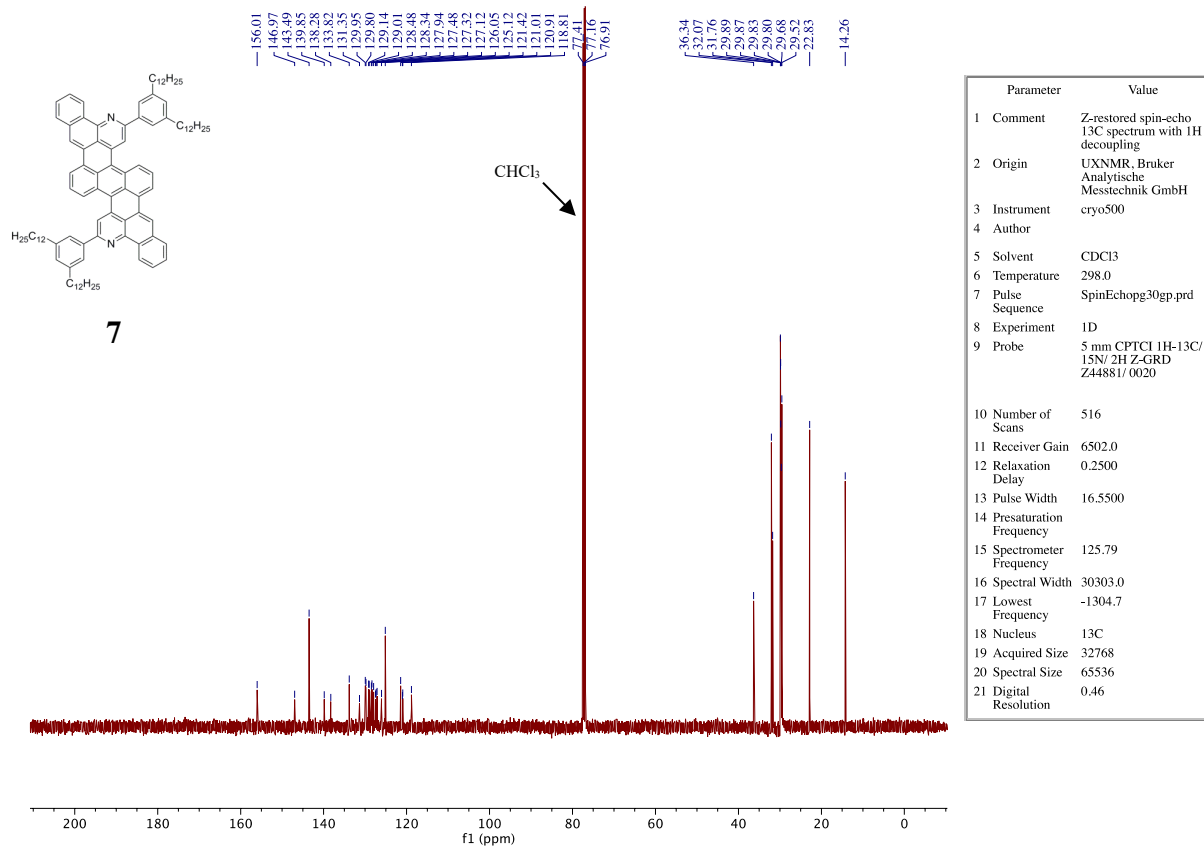

**Figure S14.** The <sup>13</sup>C NMR spectrum obtained for **7**.

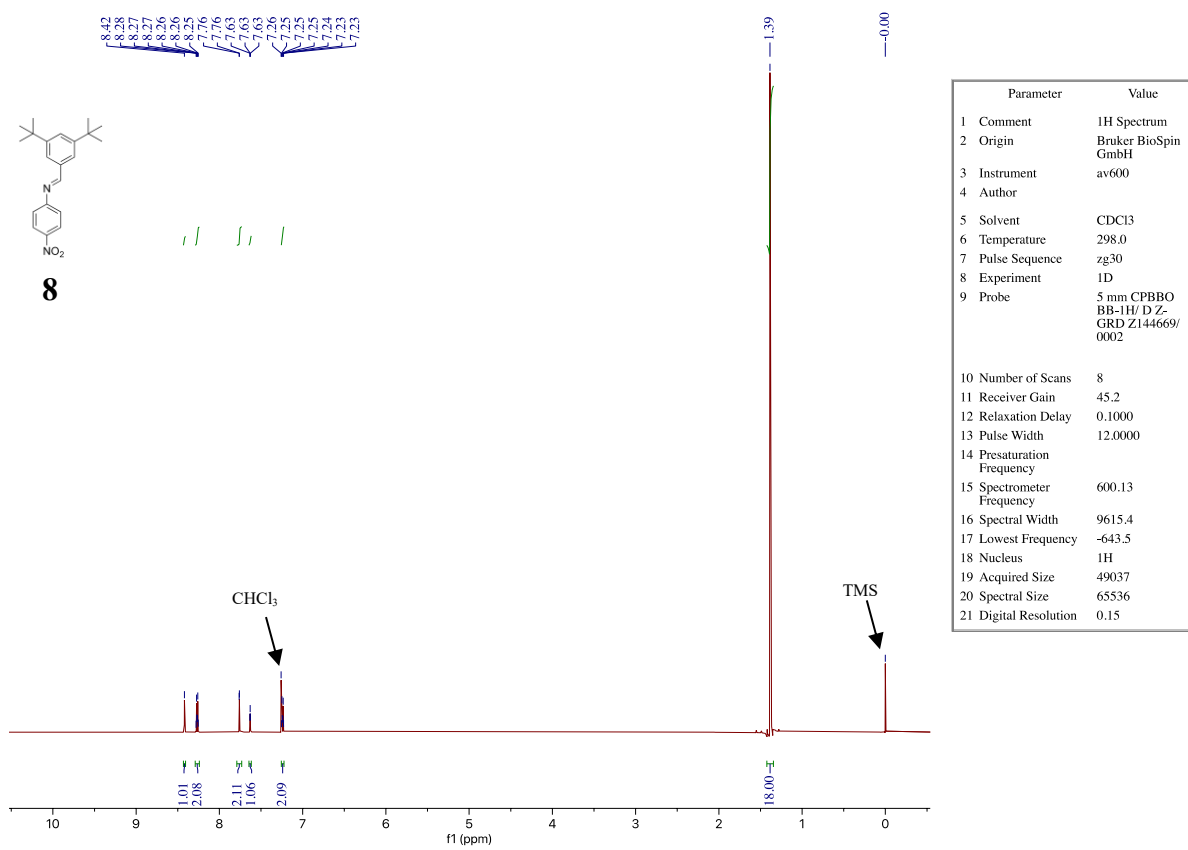

Figure S15. The <sup>1</sup>H NMR spectrum obtained for **8**.



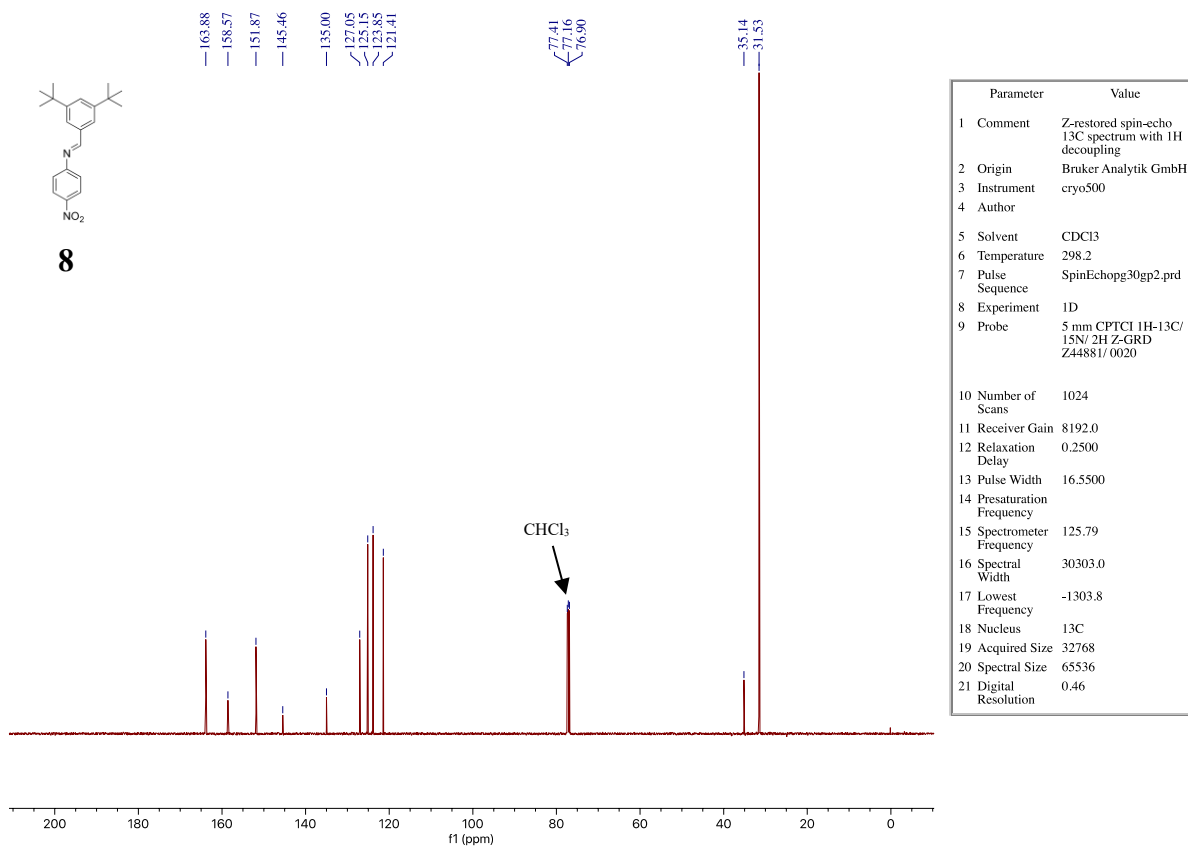

Figure S16. The  $^{13}\text{C}$  NMR spectrum obtained for **8**.

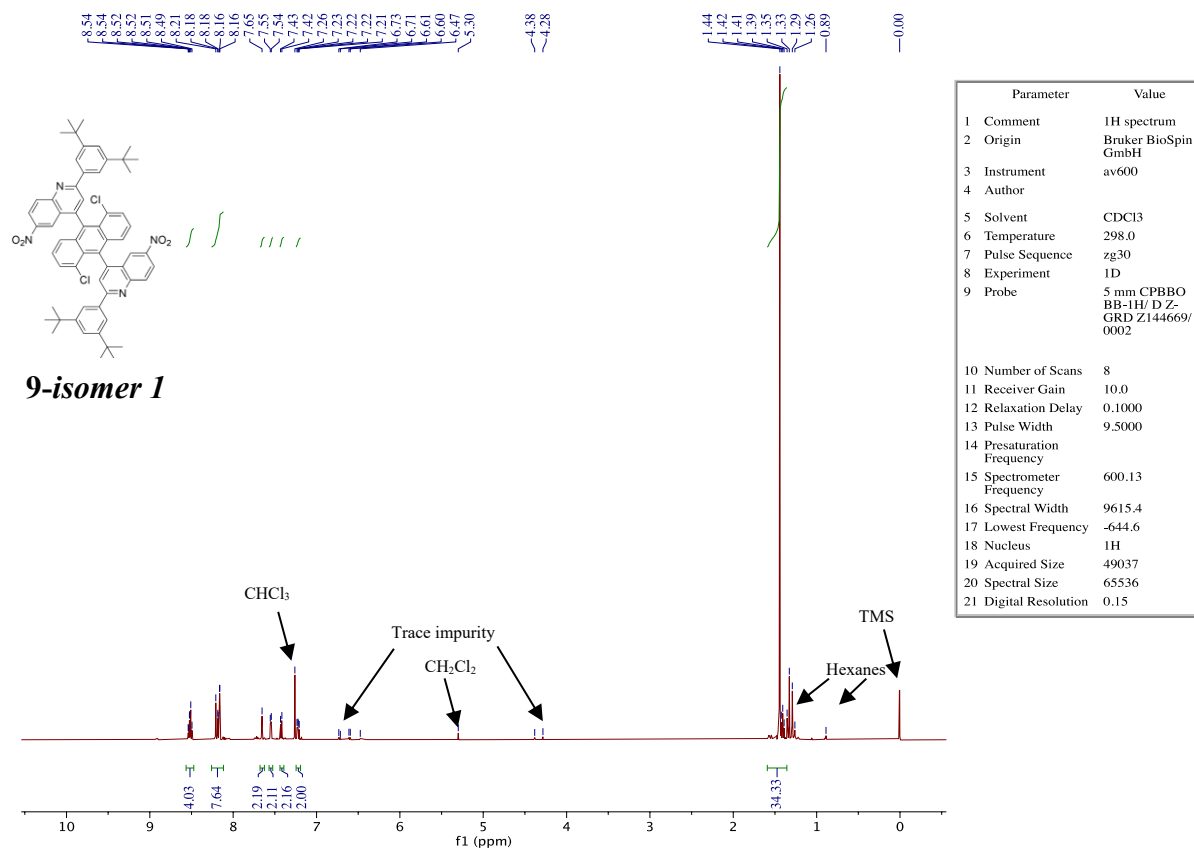

Figure S17. The  $^1\text{H}$  NMR spectrum obtained for **9-isomer 1**.

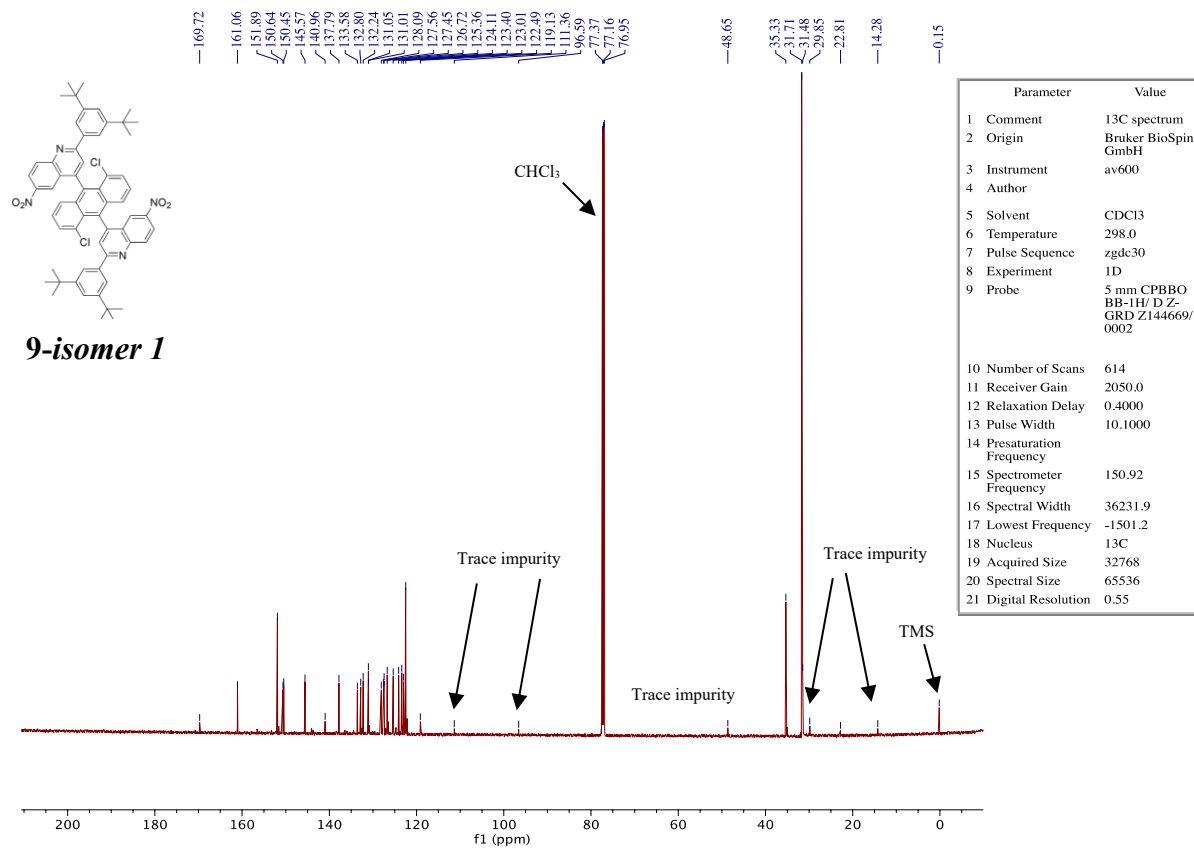

**Figure S18.** The <sup>13</sup>C NMR spectrum obtained for **9-isomer 1**.

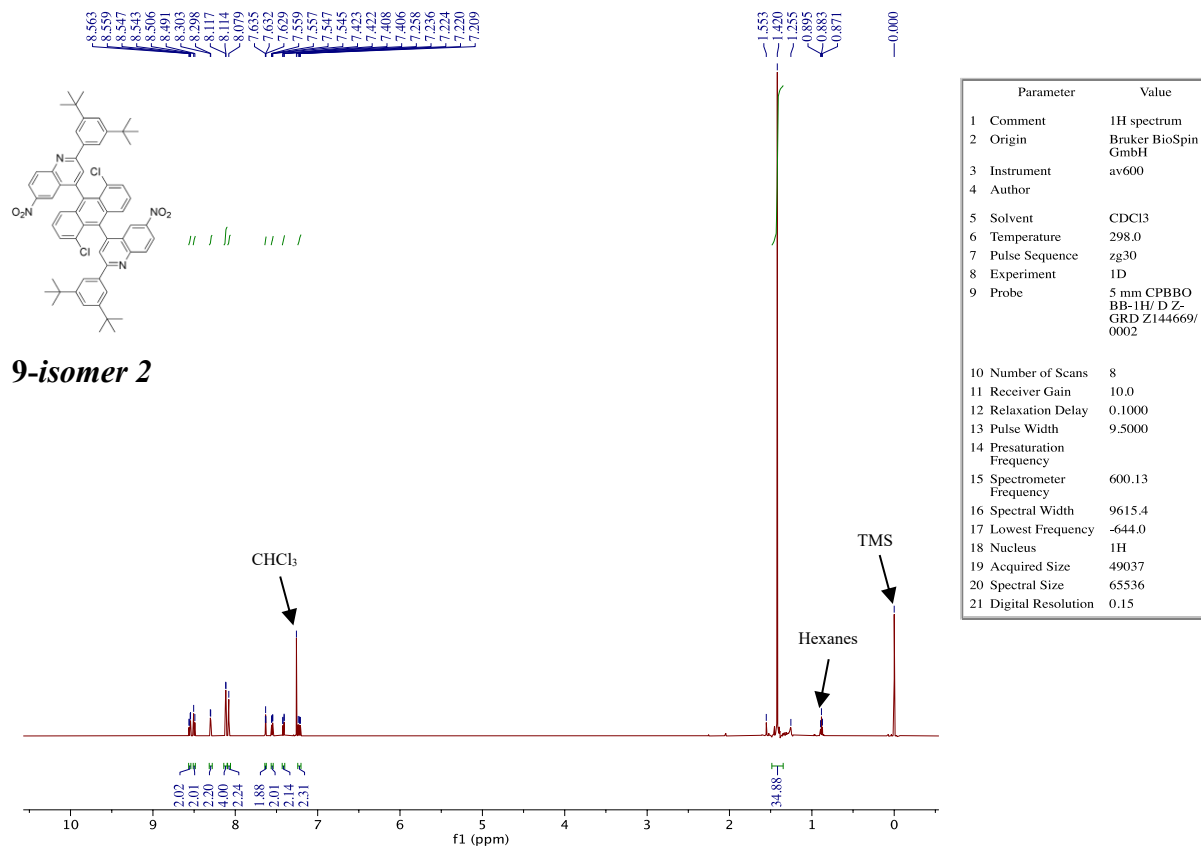

Figure S19. The <sup>1</sup>H NMR spectrum obtained for **9-isomer 2**.

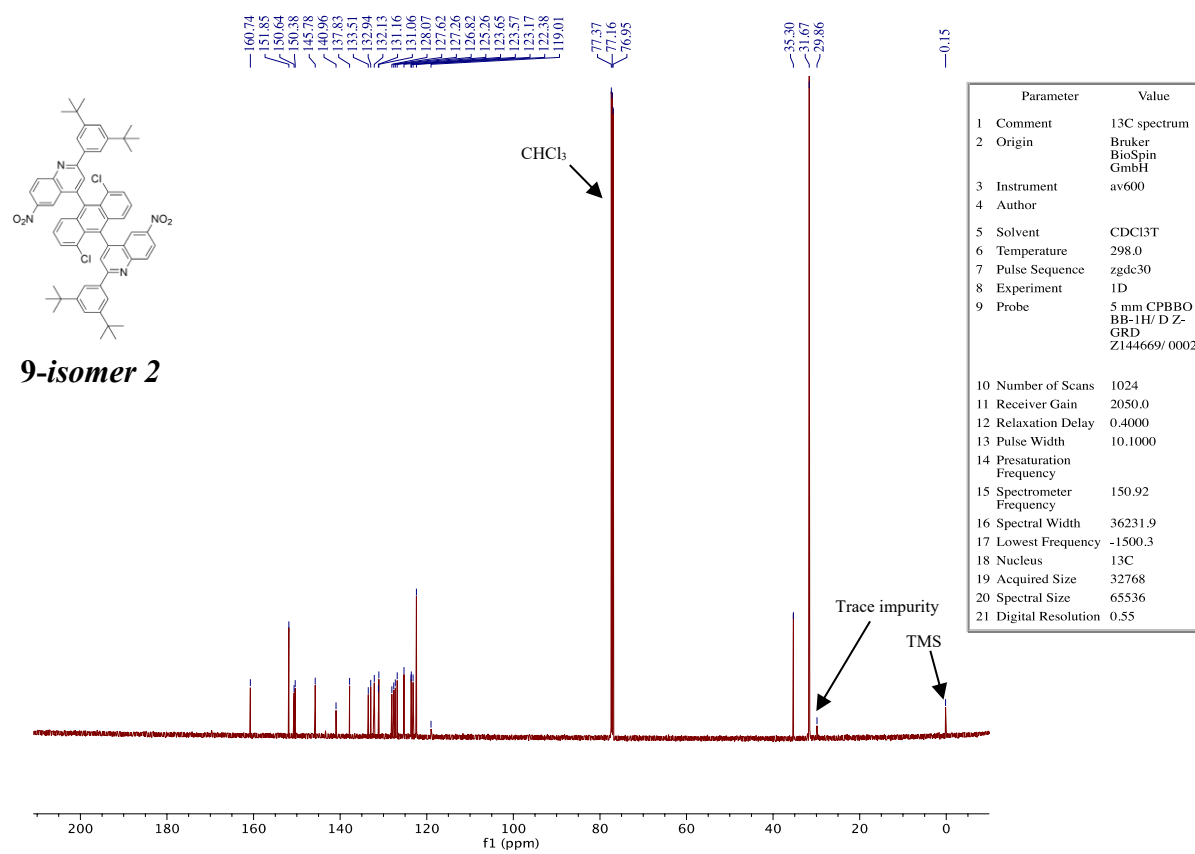

Figure S20. The  $^{13}\text{C}$  NMR spectrum obtained for **9-isomer 2**.

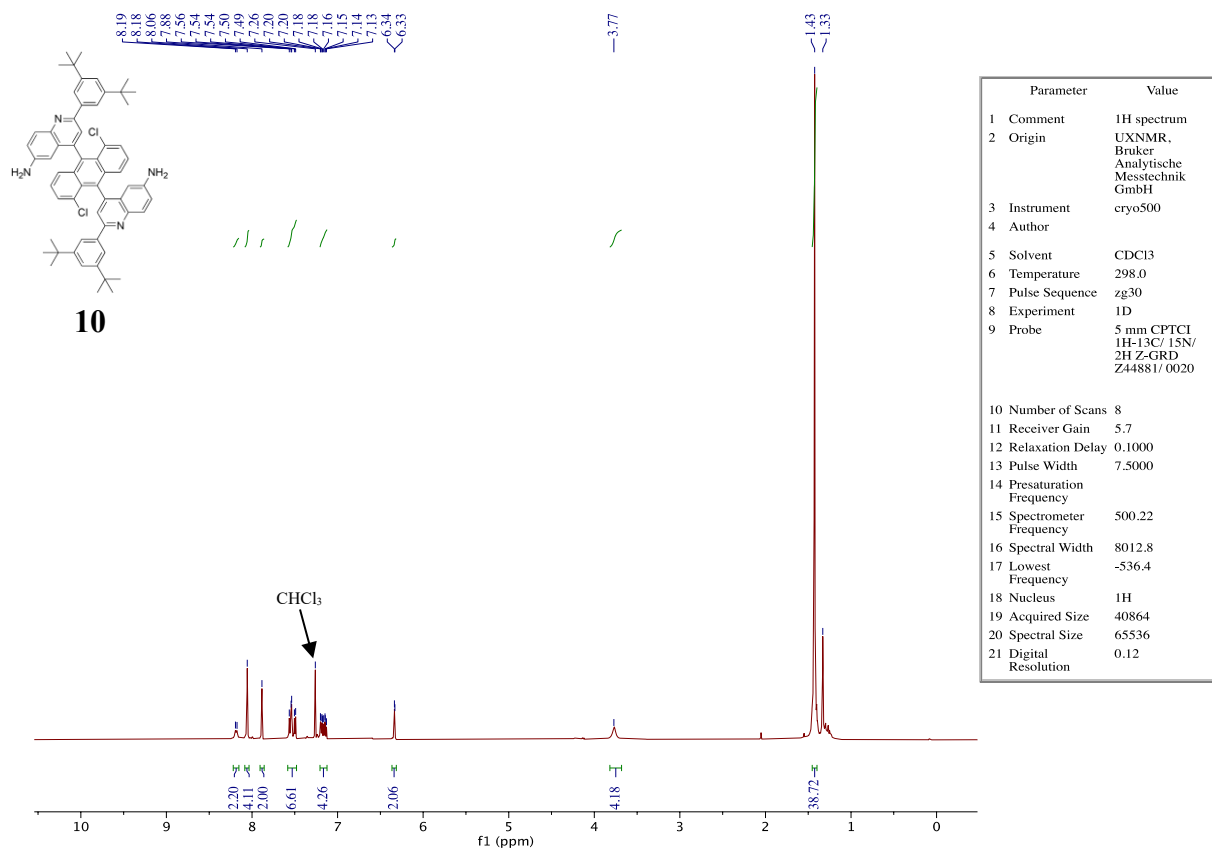

**Figure S21.** The <sup>1</sup>H NMR spectrum obtained for **10**.

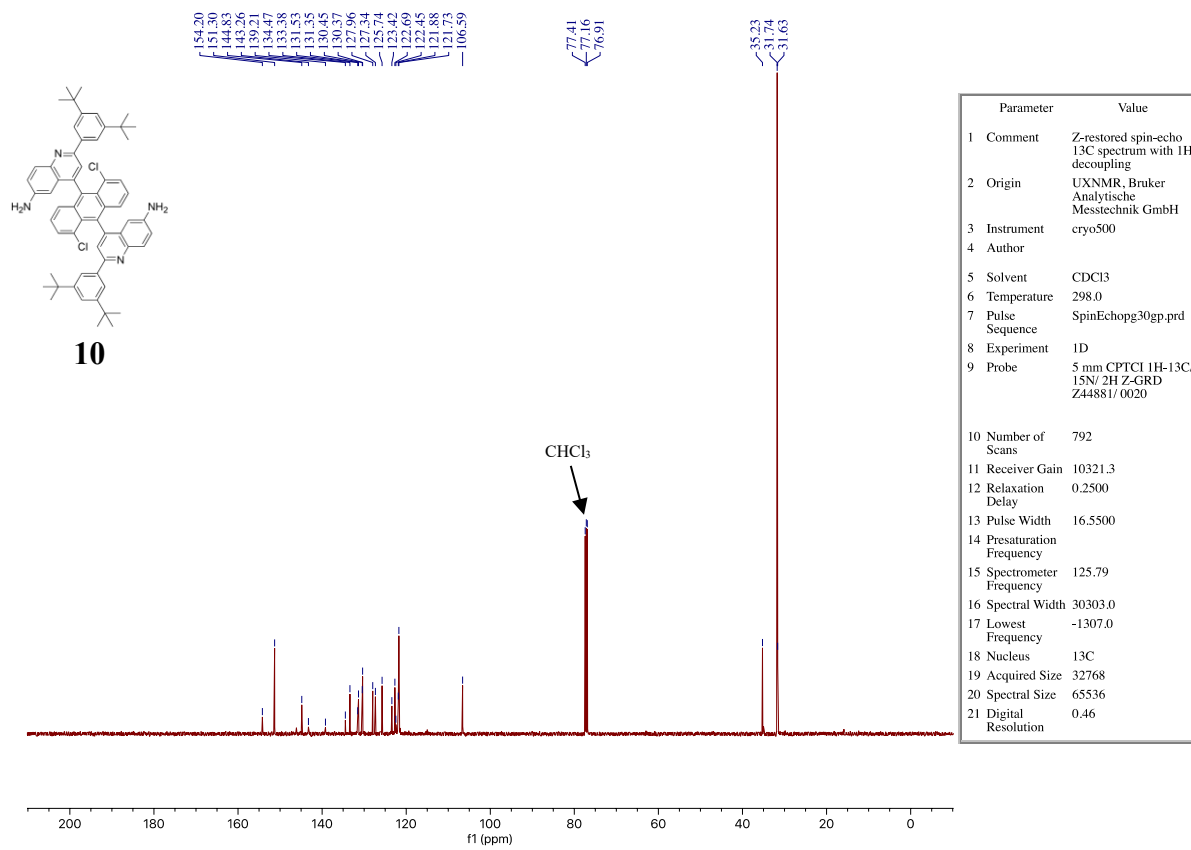

Figure S22. The  $^{13}\text{C}$  NMR spectrum obtained for **10**.

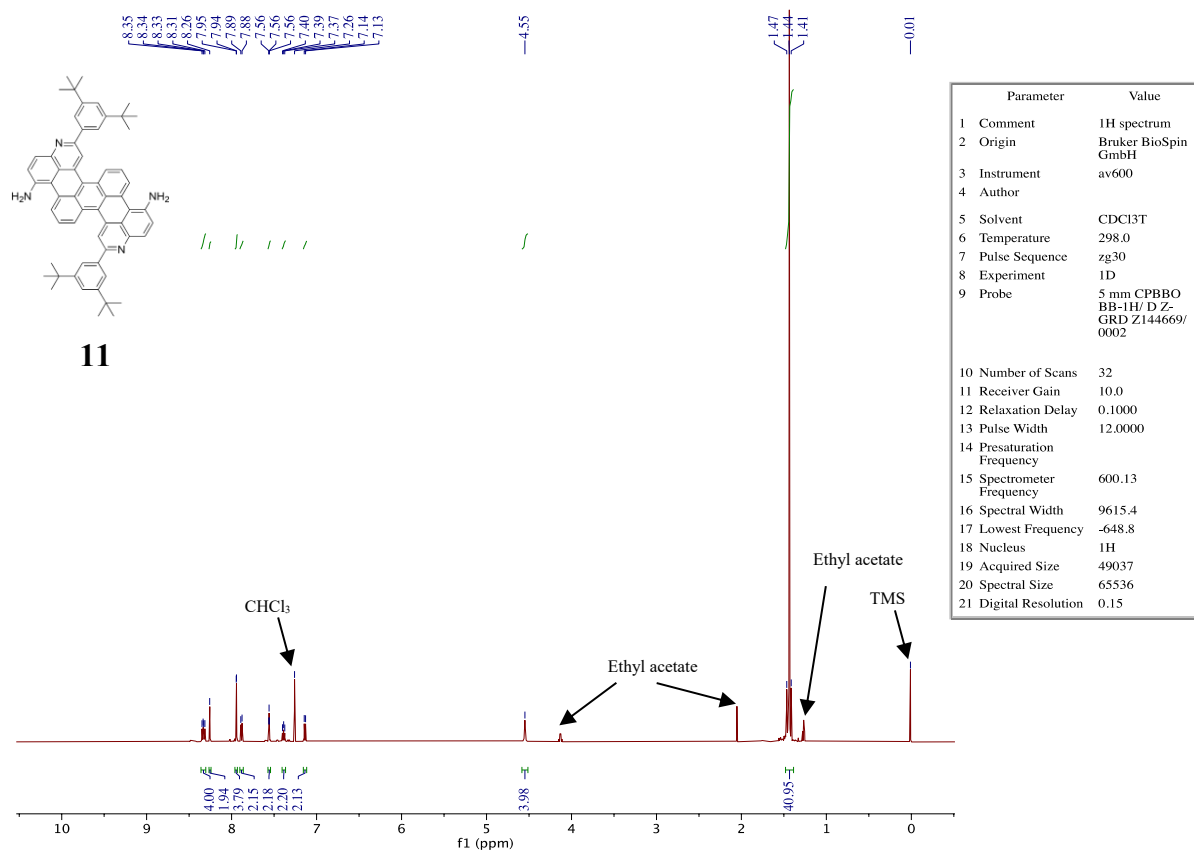

**Figure S23.** The <sup>1</sup>H NMR spectrum obtained for **11**.



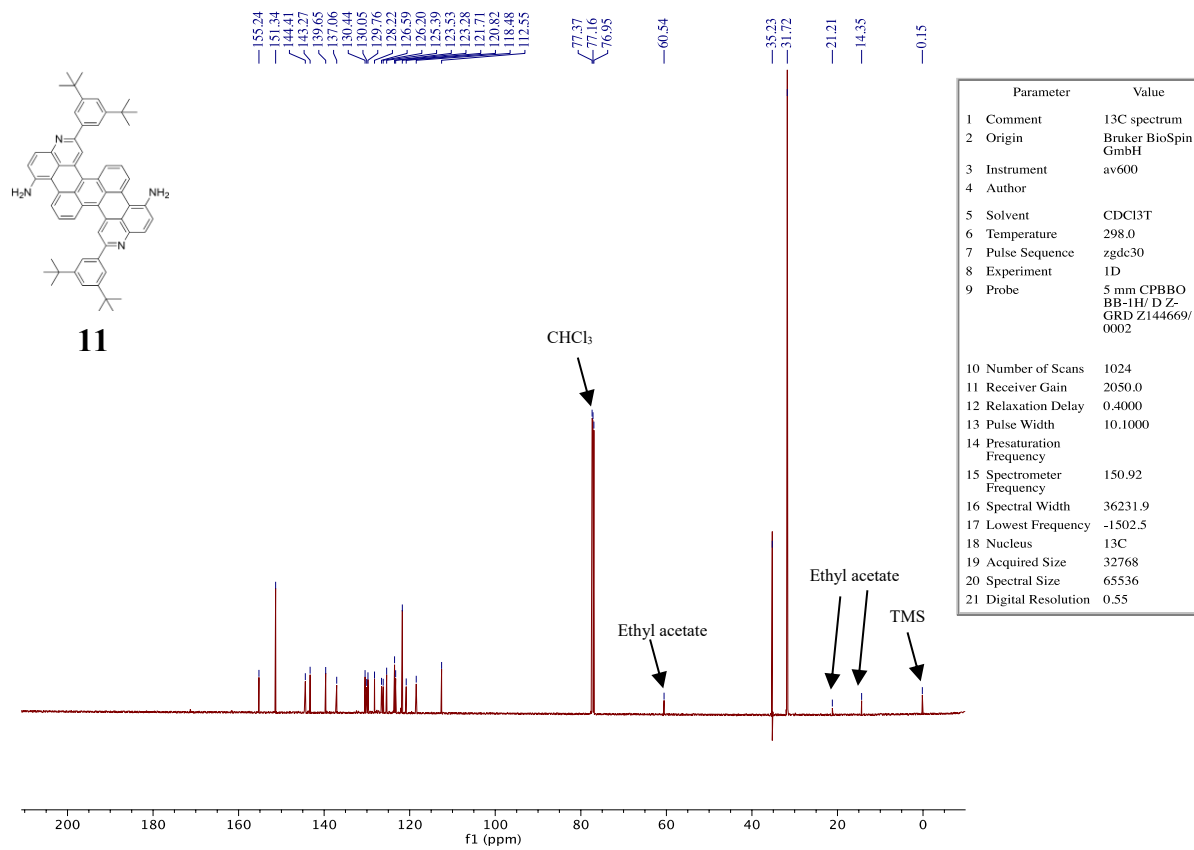

**Figure S24.** The <sup>13</sup>C NMR spectrum obtained for **11**.

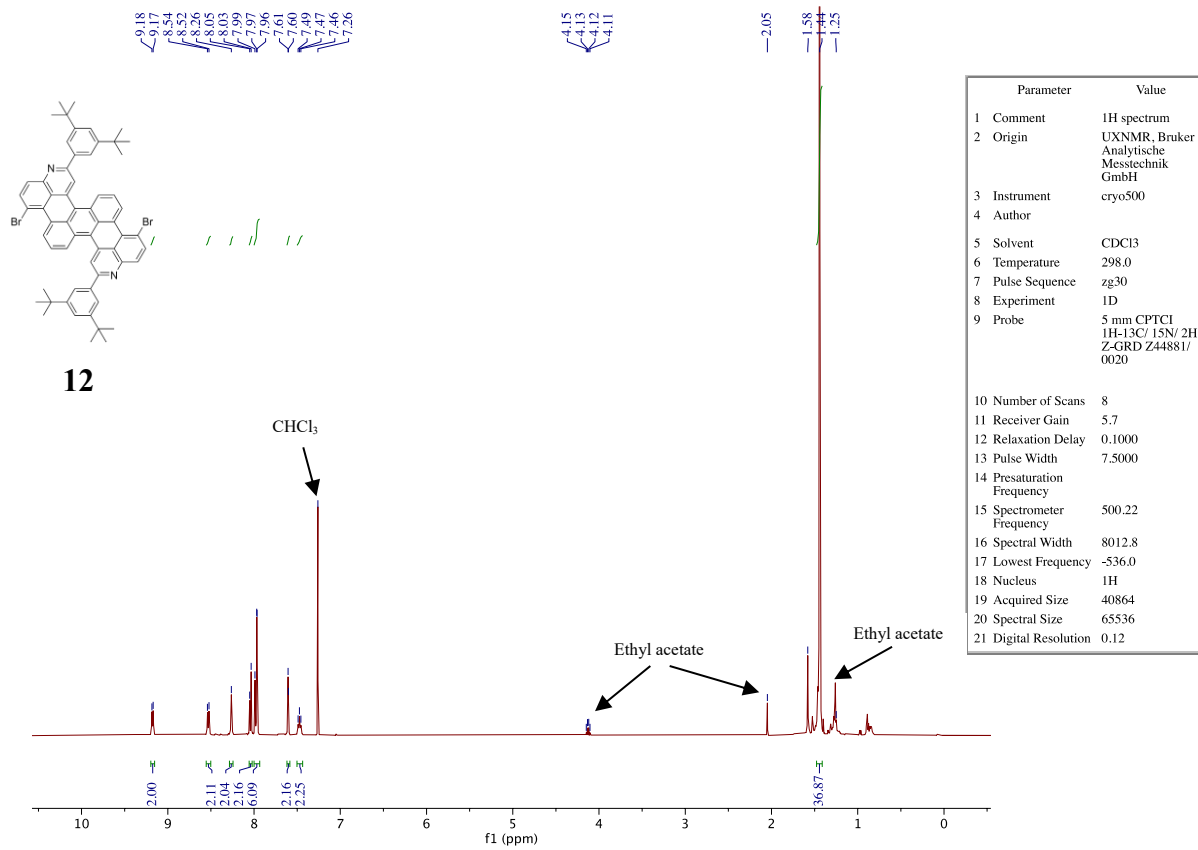

Figure S25. The <sup>1</sup>H NMR spectrum obtained for **12**.

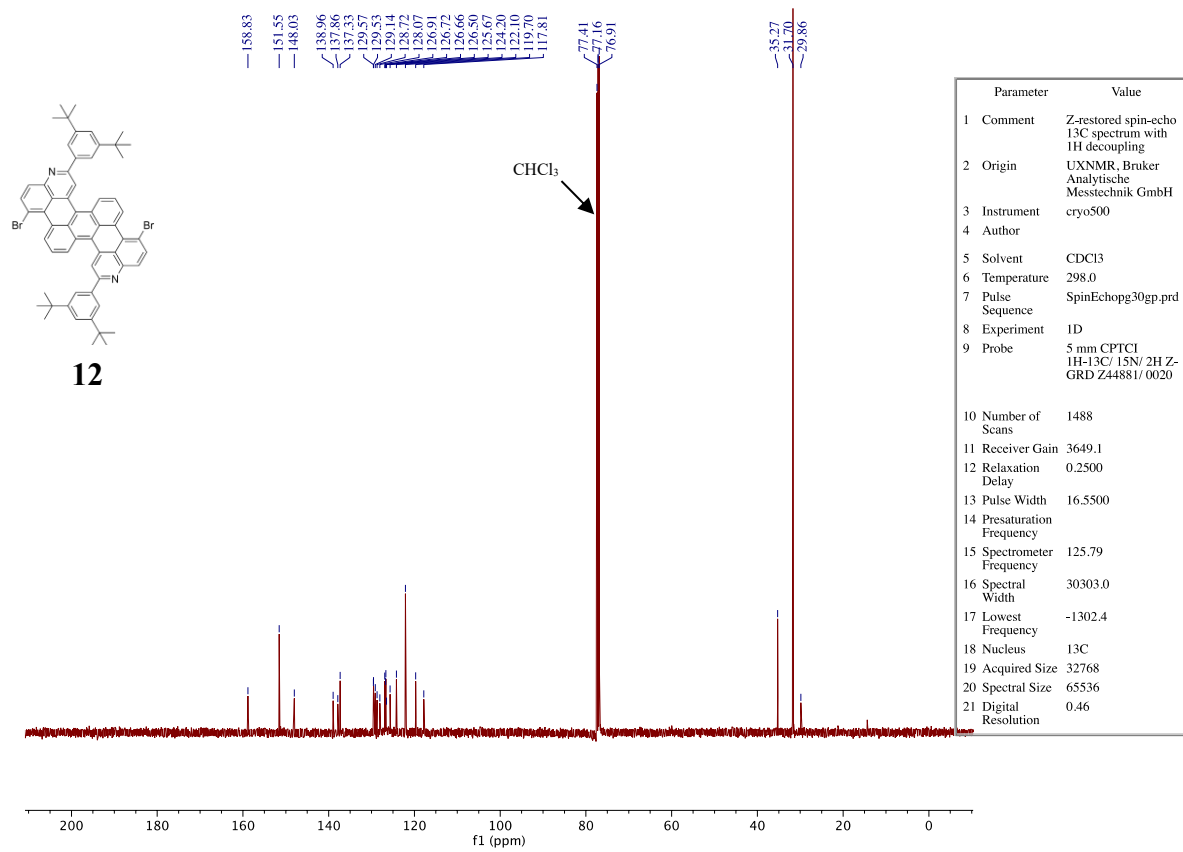

Figure S26. The <sup>13</sup>C NMR spectrum obtained for **12**.

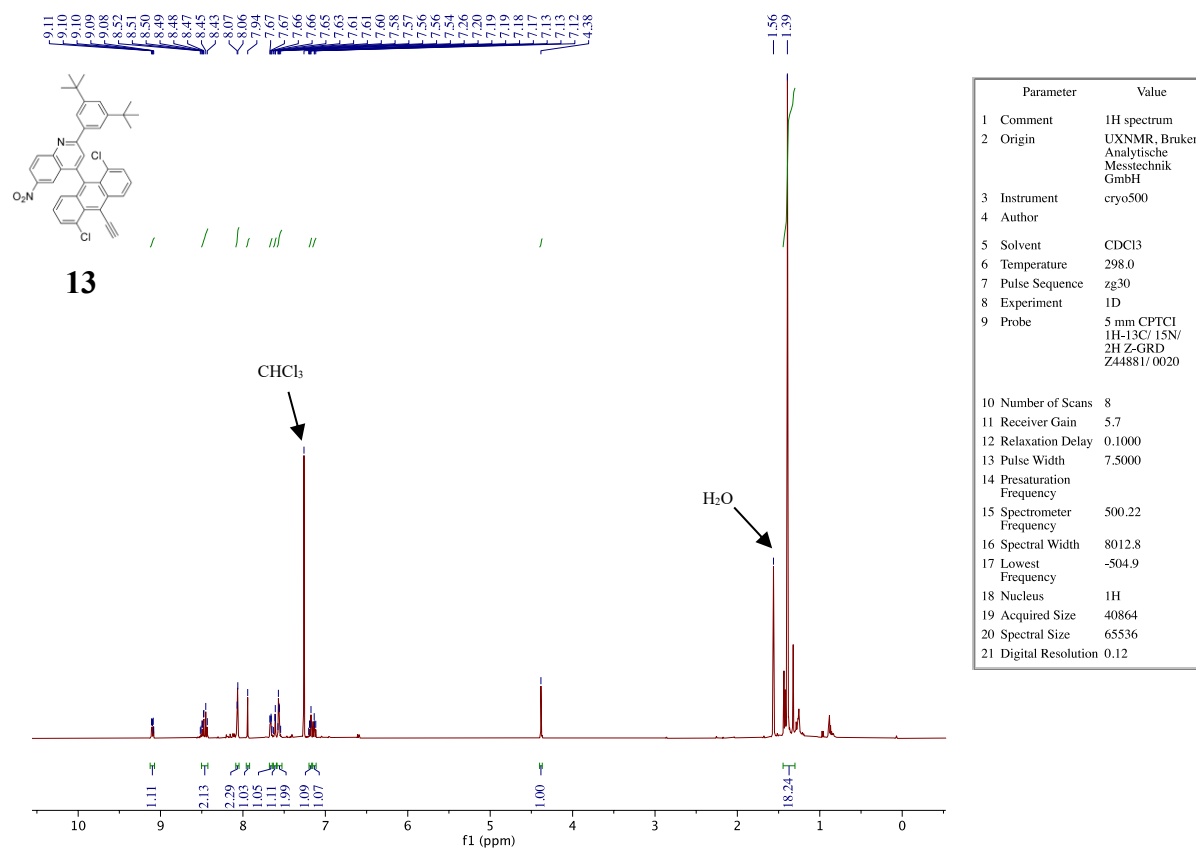

Figure S27. The <sup>1</sup>H NMR spectrum obtained for **13**.

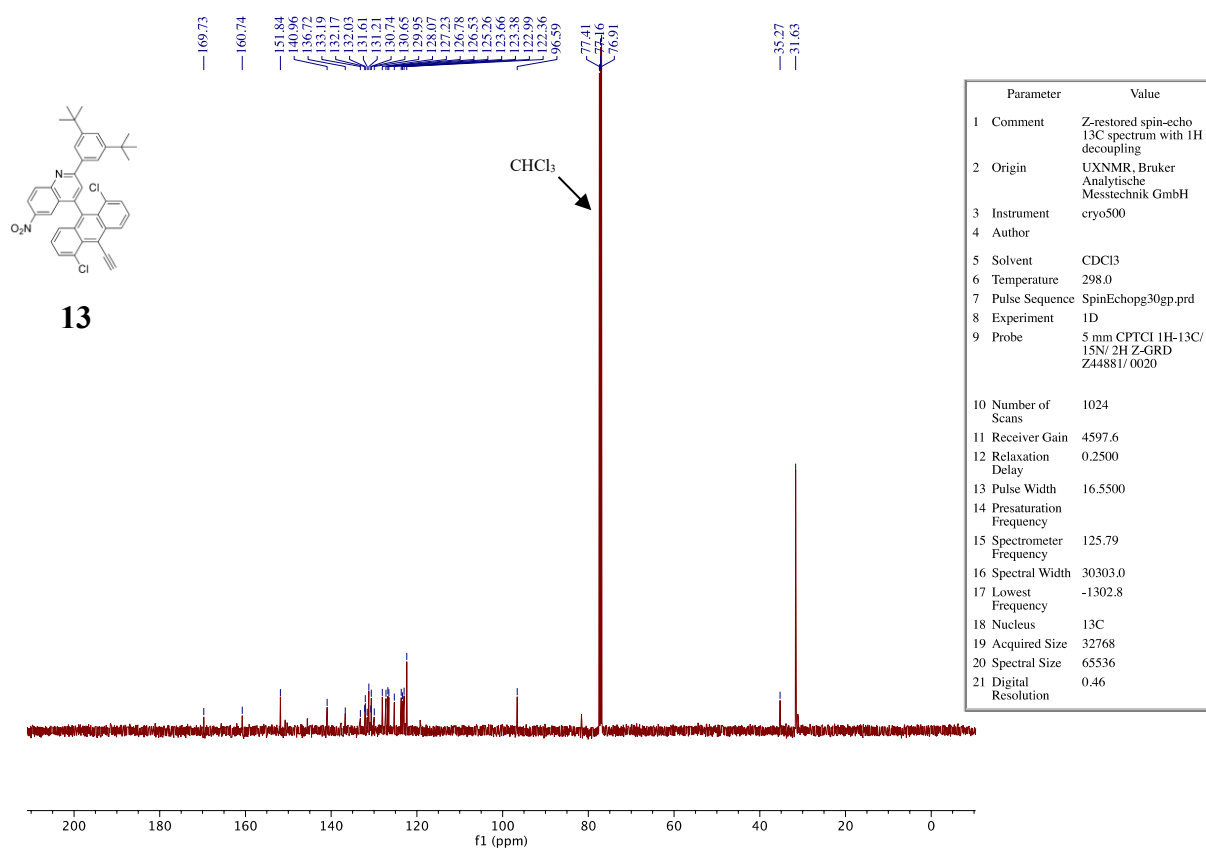

**Figure S28.** The  $^{13}\text{C}$  NMR spectrum obtained for **13**.

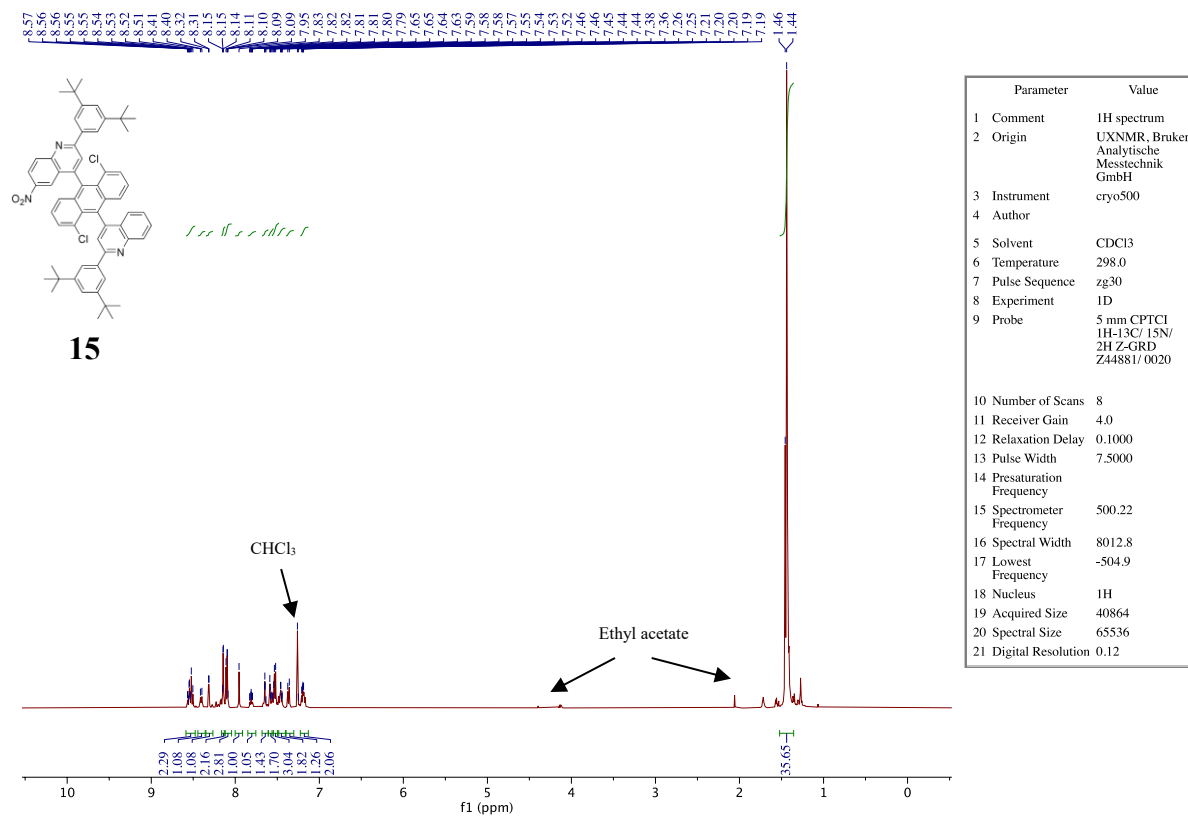

Figure S29. The <sup>1</sup>H NMR spectrum obtained for **15**.

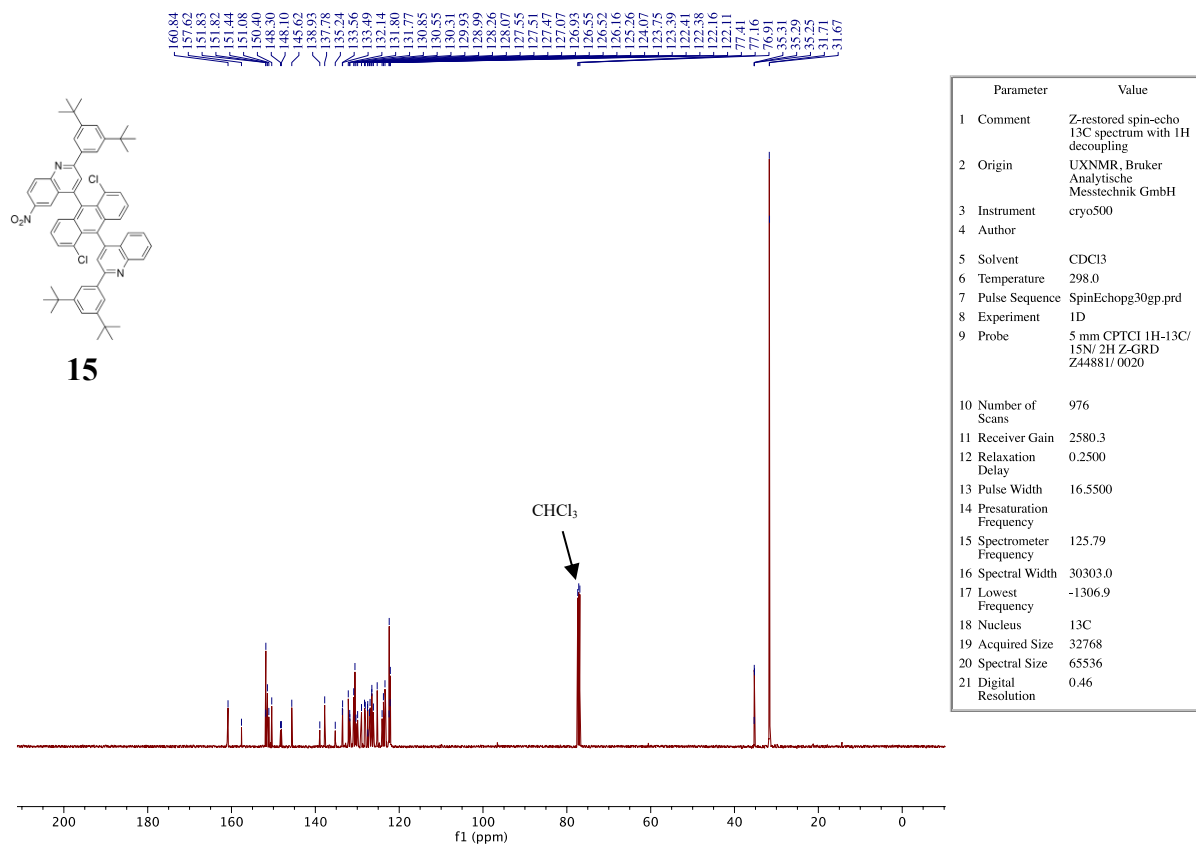

Figure S30. The <sup>13</sup>C NMR spectrum obtained for **15**.

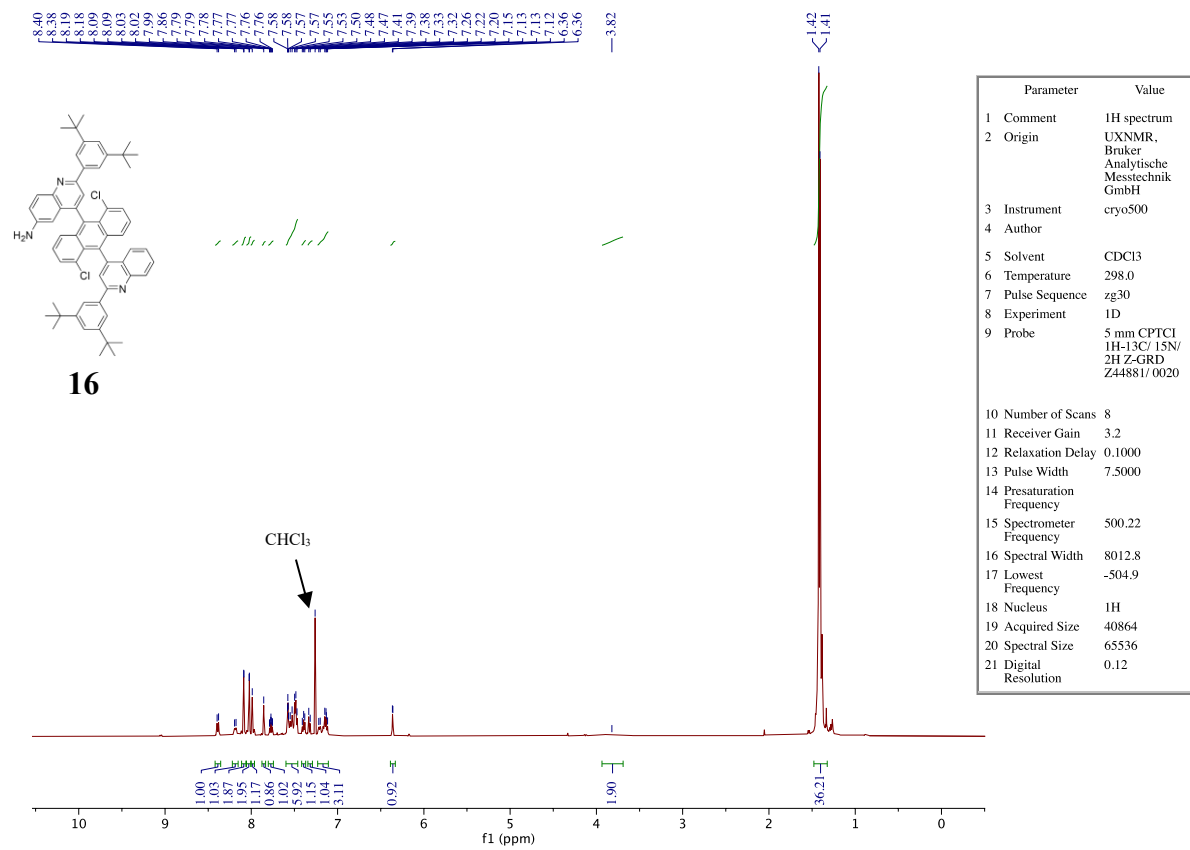

**Figure S31.** The <sup>1</sup>H NMR spectrum obtained for **16**.



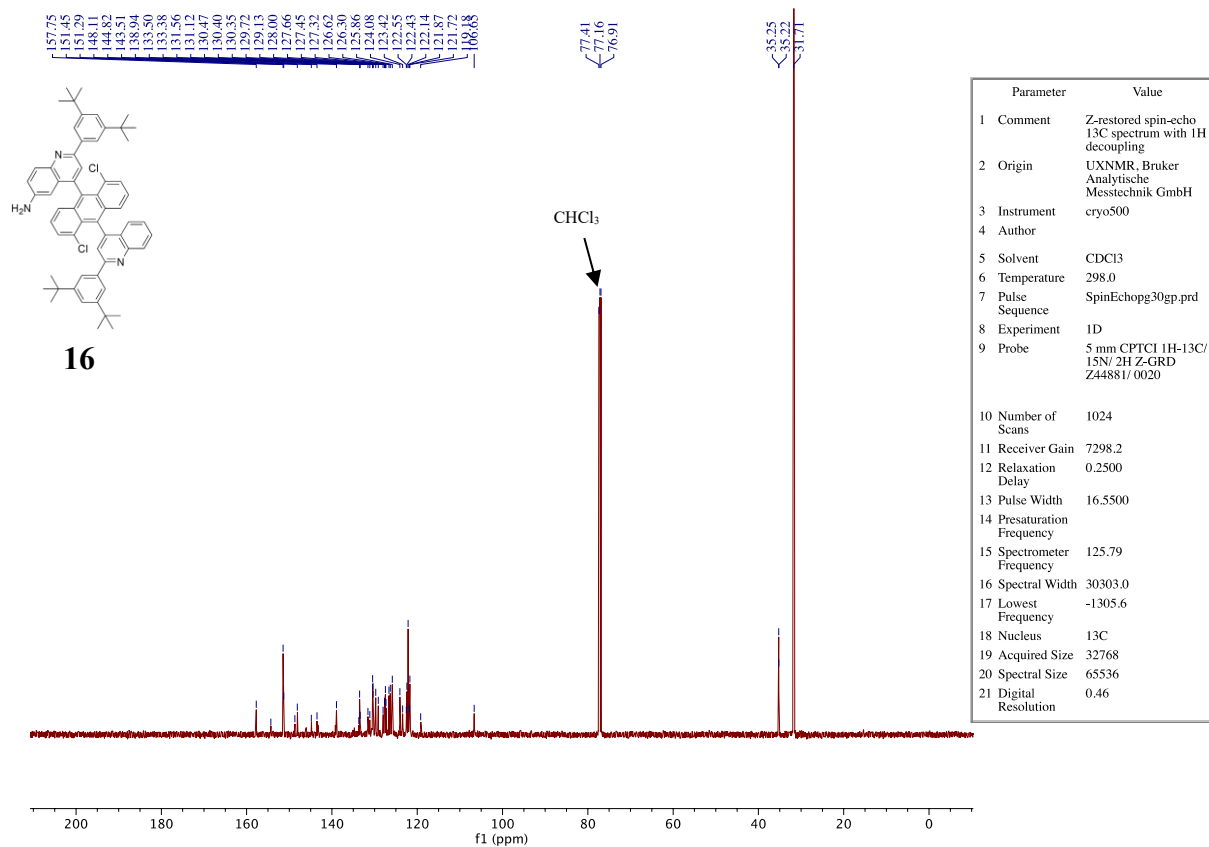

**Figure S32.** The  $^{13}\text{C}$  NMR spectrum obtained for **16**.

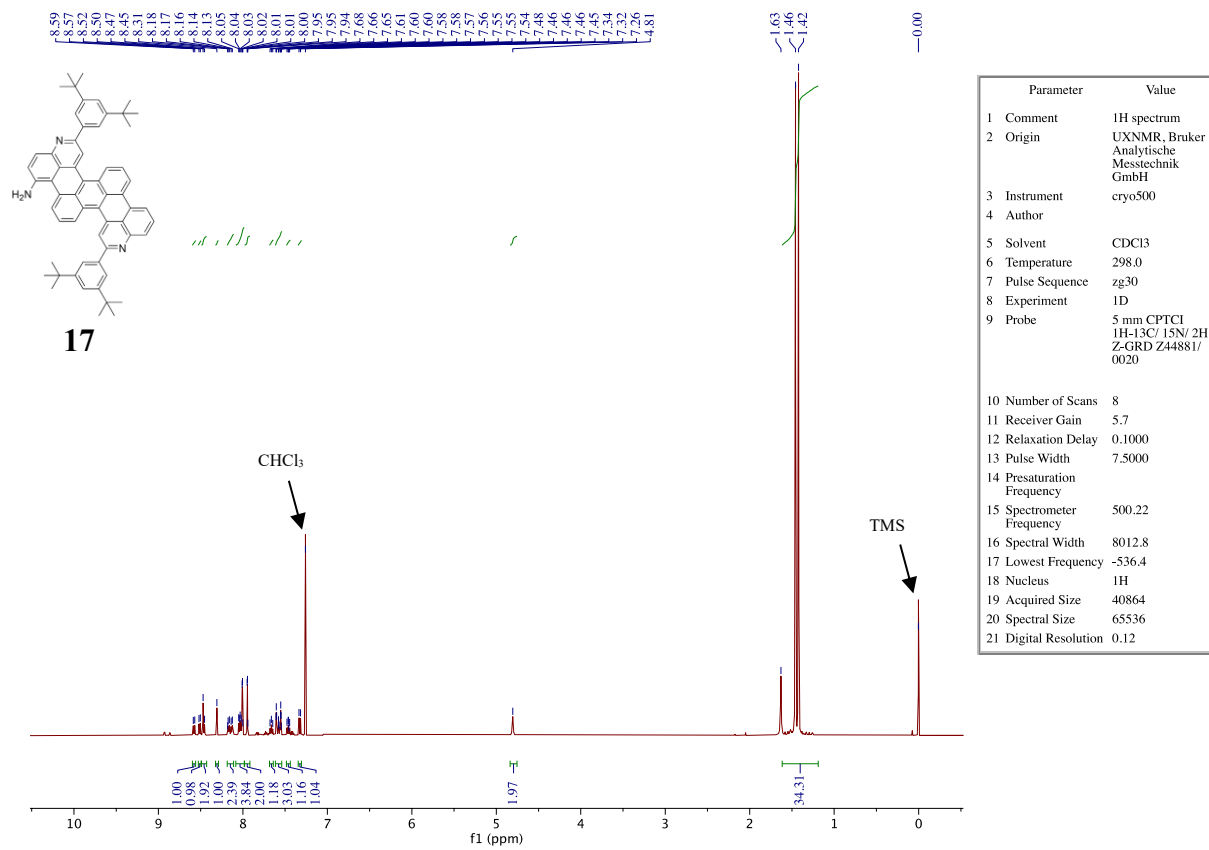

Figure S33. The <sup>1</sup>H NMR spectrum obtained for **17**.

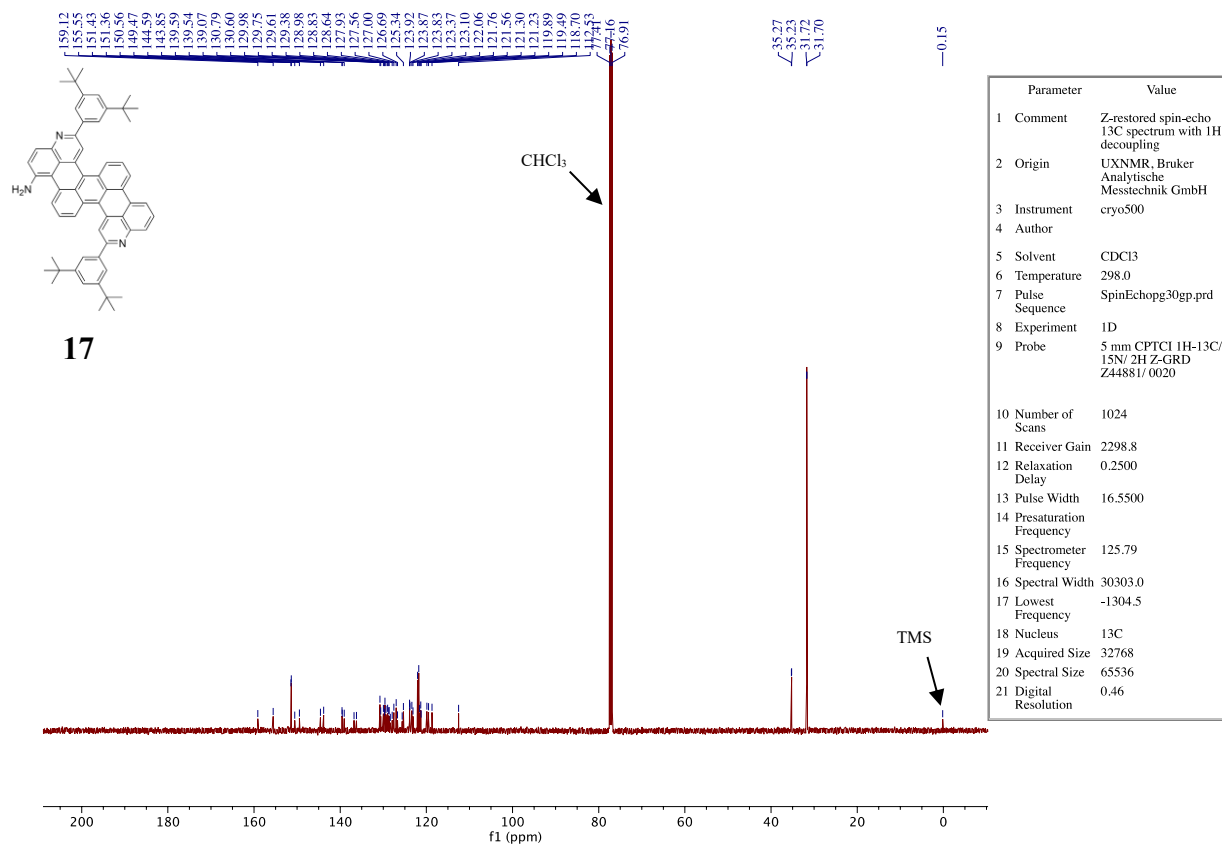

Figure S34. The <sup>13</sup>C NMR spectrum obtained for 17.

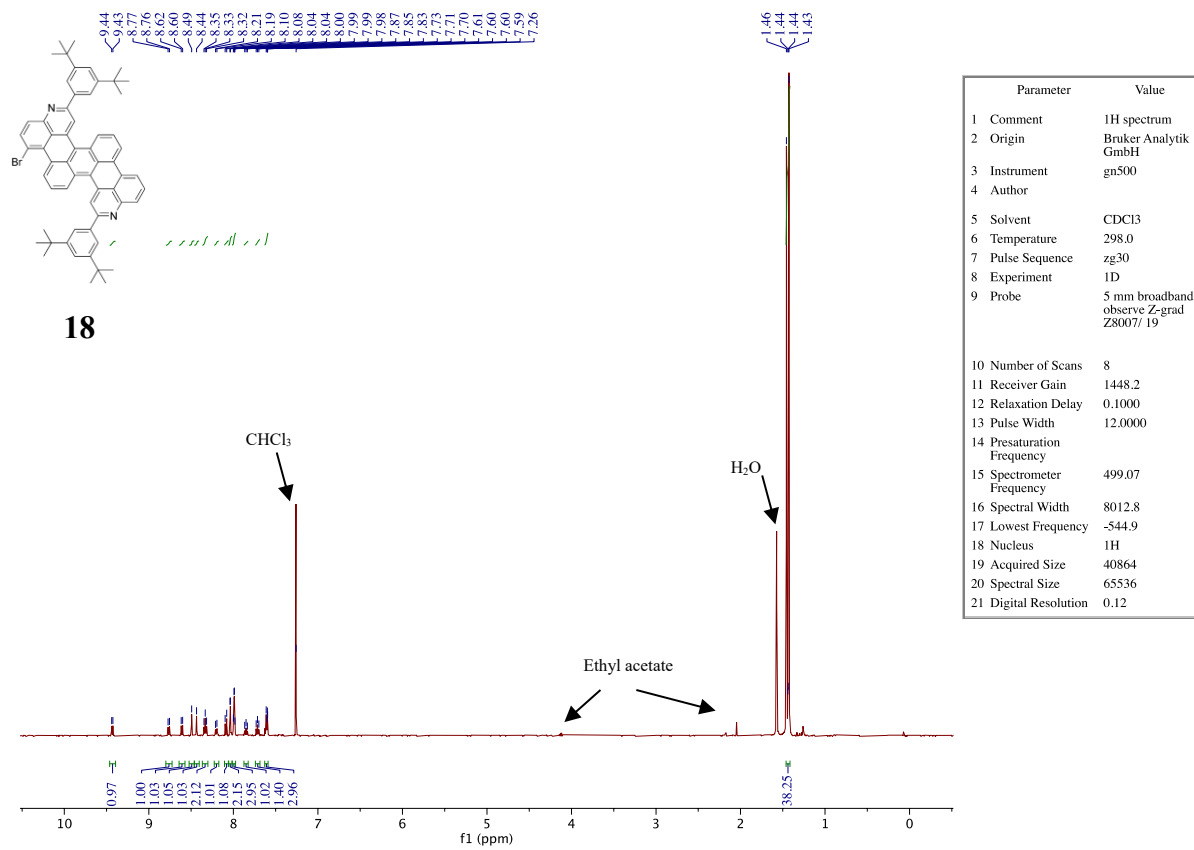

Figure S35. The <sup>1</sup>H NMR spectrum obtained for **18**.

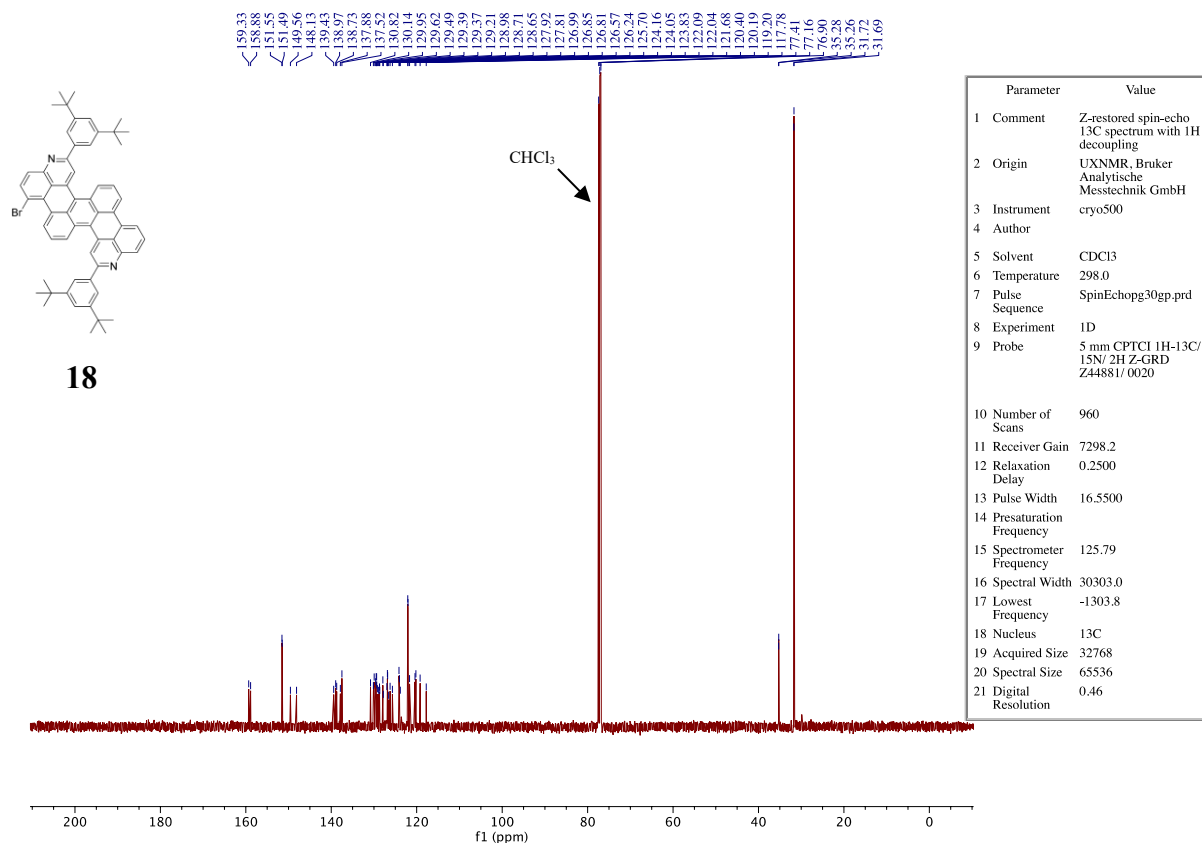

Figure S36. The  $^{13}\text{C}$  NMR spectrum obtained for **18**.

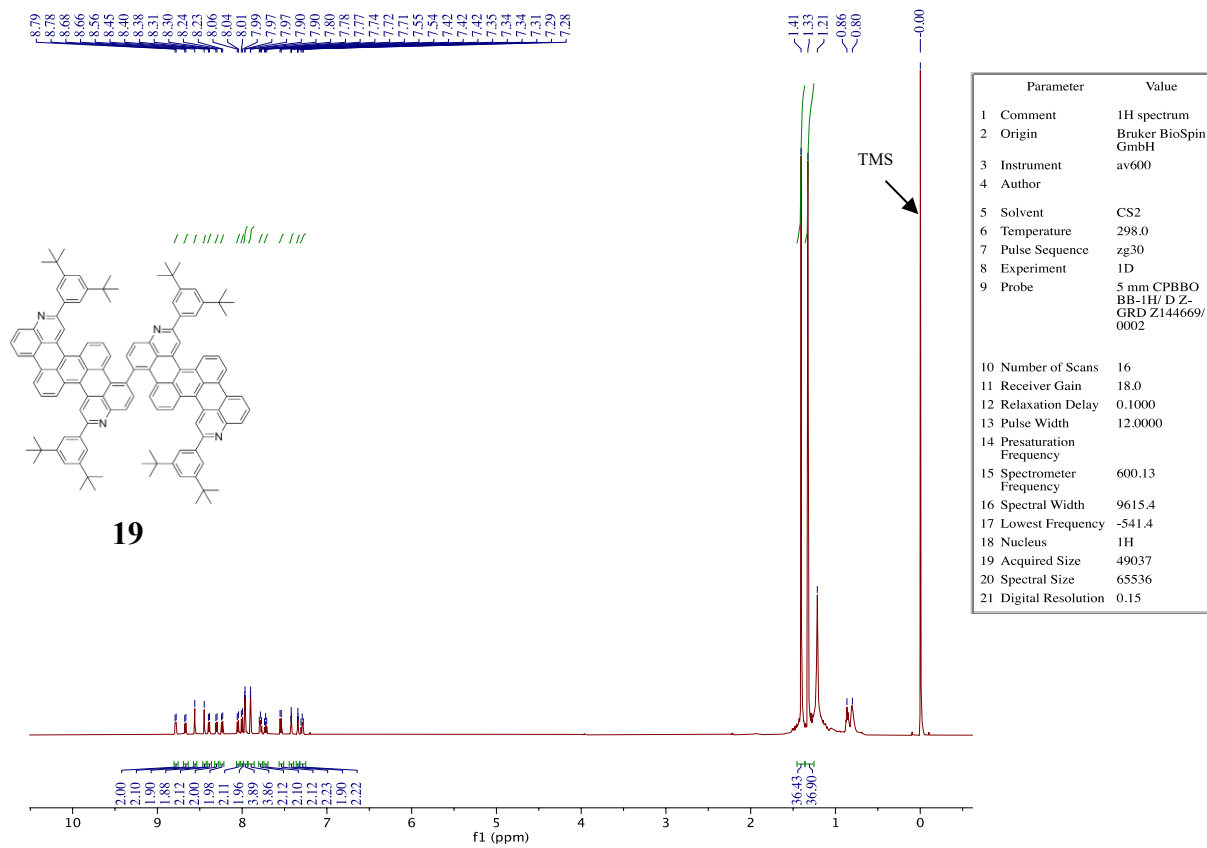

**Figure S37.** The <sup>1</sup>H NMR spectrum obtained for **19**.

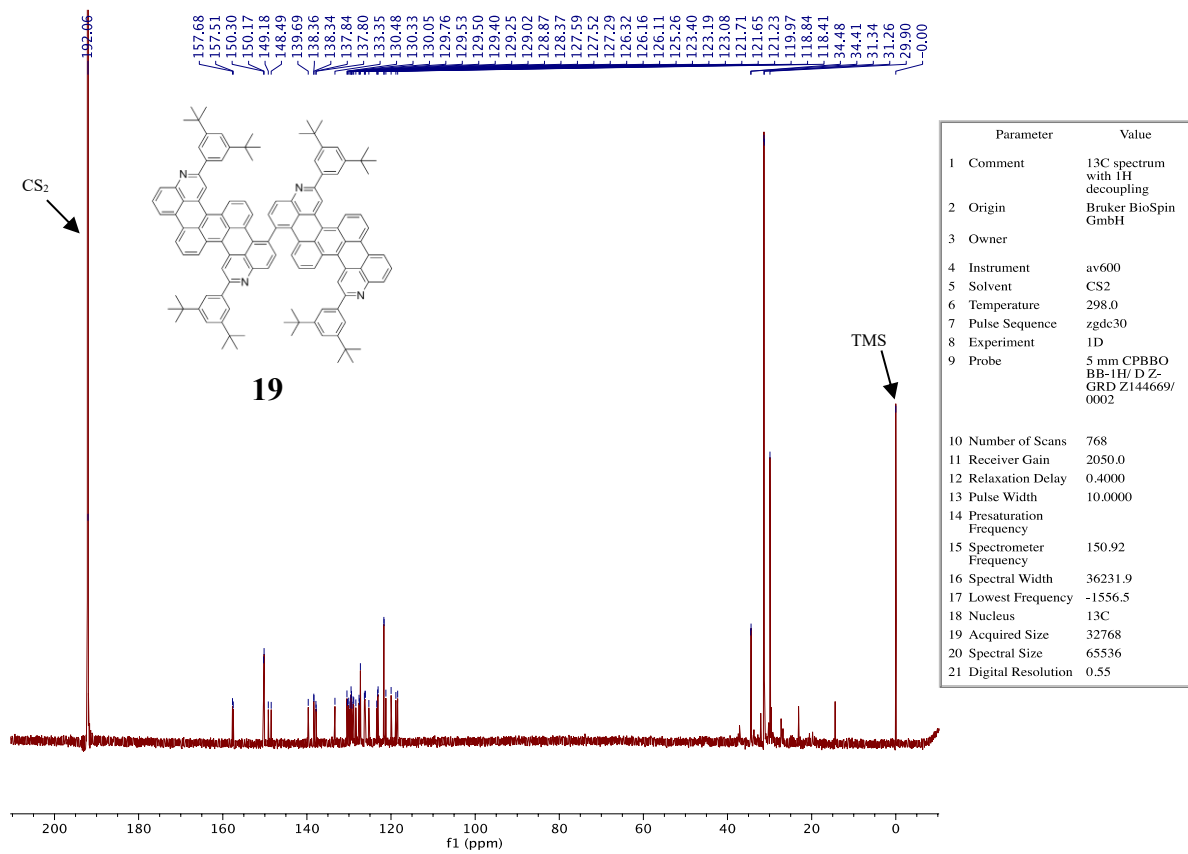

Figure S38. The <sup>13</sup>C NMR spectrum obtained for **19**.

## II. UV-Vis Spectroscopy Data

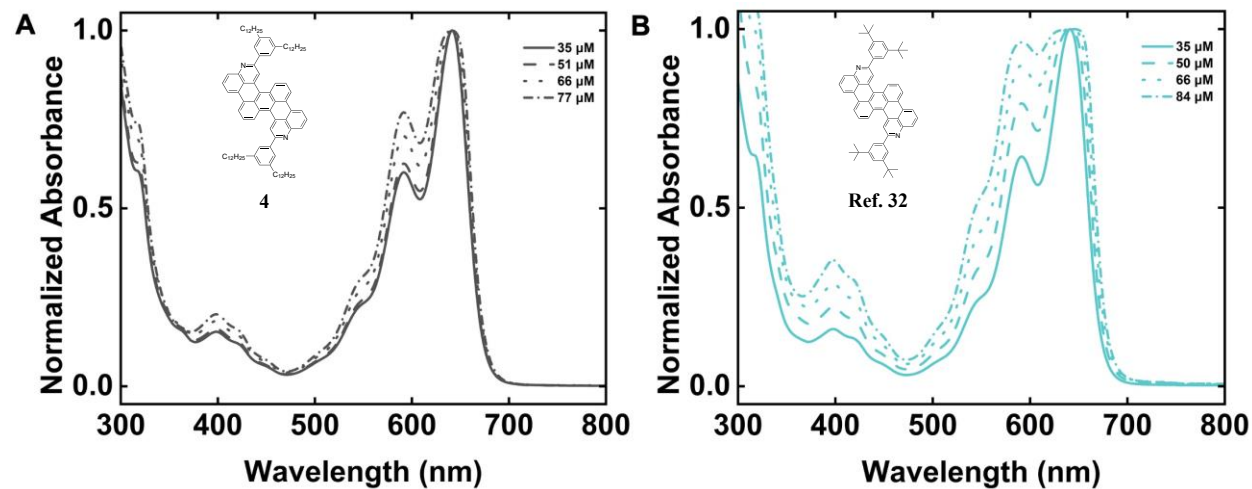

**Figure S39.** (A) The UV-Vis absorption spectra obtained for dodecyl-substituted tetrabenzopentacene **4** at different concentrations. (B) The UV-Vis absorption spectra measured for a previously-reported tert-butyl-substituted tetrabenzopentacene (see reference 32). Note that the absorption spectra were normalized by using their maximum absorbance peak within the 600 nm to 700 nm wavelength range in order to facilitate direct comparisons.
